1                   **Intracellular mechanisms of fungal space searching in microenvironments**

2  
3                   Marie Held<sup>a</sup>, Ondrej Kaspar<sup>b</sup>, Clive Edwards<sup>c</sup>, Dan V. Nicolau<sup>a,b</sup>

4                   <sup>a</sup> Department of Electrical Engineering and Electronics, University of Liverpool, Liverpool  
5                   L69 3GJ, United Kingdom

6                   <sup>b</sup> Department of Bioengineering, Faculty of Engineering, McGill University, Montreal,  
7                   Quebec, H3A 0C3, Canada

8                   <sup>c</sup> School of Biological Sciences, University of Liverpool, Liverpool L69 7ZB, United  
9                   Kingdom

10  
11                   **Abstract**

12                   The underlying intracellular mechanisms involved in the fungal growth received considerable  
13                   attention, but the experimental and theoretical work did not take into account the modulation  
14                   of these processes by constraining microenvironments similar to many natural fungal habitats.  
15                   To fill this gap in the scientific knowledge, we used time-lapse live-cell imaging of  
16                   *Neurospora crassa* growth in custom-built confining microfluidics environments. We show  
17                   that the position and dynamics of the Spitzenkörper-microtubules system in constraining  
18                   environments differs markedly from that associated with unconstrained growth. First, when  
19                   hyphae encounter an obstacle at shallow angles, the Spitzenkörper moves from its central  
20                   position in the apical dome off-axis towards a contact with the obstacle, thus functioning as a  
21                   compass preserving the ‘directional memory’ of the initial growth. The trajectory of  
22                   Spitzenkörper is also followed by microtubules, resulting in a ‘cutting corners’ pattern of the  
23                   cytoskeleton in constrained geometries. Second, when an obstacle blocks a hypha at near-  
24                   normal incidence, the Spitzenkörper-microtubule system temporarily disintegrates, followed  
25                   by the formation of two equivalent systems in the proto-hyphae – the basis of obstacle-  
26                   induced branching. Third, a hypha, passing a lateral opening along a wall, continues to grow  
27                   largely unperturbed while a lateral proto-hypha gradually branches into the opening, which  
28                   starts forming its own Spitzenkörper-microtubule system. These observations suggest that the  
29                   Spitzenkörper-microtubules system conserves the directional memory of the hyphae when  
30                   they navigate around obstacles, but in the absence of the Spitzenkörper-microtubule system  
31                   during constraint-induced apical splitting and lateral branching, the probable driving force  
32                   of obstacle-induced branching is the isotropic turgor pressure.

33                   **Keywords**

34                   Fungal growth, microtubules, Spitzenkörper, live-cell imaging, microfluidics, green  
35                   fluorescent protein (GFP)

36

## 37 Introduction

38 Filamentous fungi dwell in many and various geometrically-heterogeneous habitats, such as  
39 animal, human or plant tissue,<sup>1,2</sup> decaying wood, soil, and leaf litter.<sup>3,4</sup> The ecological  
40 ubiquity of filamentous fungi is, to a large extent, the consequence of their efficient search for  
41 space available for growth, often in mechanically-constraining geometries. Furthermore,  
42 because hyphae can grow for relatively long distances (millimetres) through media without, or  
43 with low level of nutrients, fungal space searching strategies need to be efficient even in the  
44 absence of chemotactic cues.

45 Extensive studies described several fundamental behavioural traits of fungal growth,  
46 including the directional growth of hyphae,<sup>5-9</sup> regular branching,<sup>10-12</sup> and negative  
47 autotropism<sup>13,14</sup>. These studies have overwhelmingly been performed on flat surfaces, usually  
48 made of agar, although the natural habitats of filamentous fungi typically present three-  
49 dimensional, constraining geometries. Opportunely, microfluidics devices, which have been  
50 interfaced with individual bacteria<sup>15,16</sup> mammalian,<sup>17,18</sup> and plant cells,<sup>19,20</sup> and recently  
51 fungi,<sup>21,22</sup> can be designed to mimic micron-sized, naturally-constraining habitats.  
52 Furthermore, the material of choice for the fabrication of microfluidics devices,  
53 Poly(dimethylsiloxane), PDMS,<sup>23</sup> is transparent, allowing the visualisation by microscopy  
54 techniques,<sup>18,24</sup> and it is also permeable for O<sub>2</sub>, thus allowing *in vitro* studies in more realistic  
55 conditions.

56 Capitalising on the use of microfluidics technology, our previous studies,<sup>25-27</sup> demonstrated,  
57 first for *Pycnoporus cinnabarinus*,<sup>25</sup> and later for *Neurospora crassa*,<sup>26</sup> the very different  
58 behavioural traits of fungal growth in constraining geometries, e.g., up to ten times lower  
59 apical extension rates and distances between branches, compared with those on flat surfaces.  
60 The translation of the fungal space searching process into a mathematical formalism<sup>25,28</sup>  
61 revealed that this strategy is analogous to a ‘master program’ with two ‘slave subroutines’:  
62 *directional memory*, whereby individual hyphae return to their initial growth direction after  
63 passing an obstacle forcing them to deviate from their course; and *obstacle-induced*  
64 *branching*, whereby branching occurs univoquely when the hyphae encounter a solid  
65 obstacle blocking their growth. ‘Running’ this natural program resulted in a significantly  
66 more exhaustive exploration of the available space for growth than its alternatives,<sup>25,26</sup> i.e.,  
67 turning off either directional memory, or obstacle-induced branching, or both ‘subroutines’. It  
68 was also shown that the fungal space searching program can find exits in confining mazes  
69 quicker than some artificial space searching mathematical algorithms.<sup>29</sup> However, given their  
70 behavioural focus, these studies could not offer explanations regarding the underlying ‘hard  
71 wired’ intracellular mechanisms responsible for the fungal efficient strategy for space  
72 searching in constraining geometries.

73 Studies regarding the intracellular mechanisms responsible for fungal growth, which used  
74 advanced fluorescence microscopy and were performed exclusively on non-constraining  
75 surfaces, revealed several essential processes.<sup>7,30,31</sup> First, the positioning of the Spitzenkörper  
76 (a dynamic organelle complex) at the hyphal apex correlates with the direction of apical  
77 growth and the overall cell polarisation.<sup>32-37</sup> Second, cytoskeleton dynamics (involving  
78 microtubules, actin, and protein molecular motors) mediate the directional, long distance  
79 transport of secretory vesicles from the body of the fungus towards the hyphal apex, carrying  
80 material for building the hyphal cell wall. While microtubule dynamics have been extensively  
81 studied,<sup>38-43</sup> the understanding of the role of actin filaments is less developed and more  
82 recent.<sup>44-48</sup> Third, the dynamic process of construction of hyphal walls results in an increase in  
83 stiffness from the apical to the basal regions.<sup>38,41,43,49-52</sup> Finally, the gradients of ion  
84 concentration along the hypha and between the hyphal cytoplasm and the outside environment  
85 produce considerable turgor pressure, which provides a distributed internal driving force for

86 fungal growth that is manifested primarily at the hyphal tip, and which allows the penetration  
87 through soft obstacles.<sup>53-56</sup>

88 Although the understanding of the growth-relevant intracellular processes, in particular the  
89 roles of Spitzenkörper, microtubules, and turgor pressure, is advanced and comprehensive, the  
90 large differences between the behavioural traits of fungal growth in non-constraining versus  
91 constraining environments suggest that the present knowledge requires an important upgrade.  
92 To elucidate the constraint-specific intracellular process in fungi, in particular their role in  
93 directional memory and obstacle-induced branching, the present work used time-lapse laser  
94 scanning confocal microscopy to image the dynamics of growth of *Neurospora crassa*, in  
95 particular the dynamics of fluorescently labelled Spitzenkörper and microtubules, in confining  
96 microfluidics networks. The resulting insight into confined fungal growth is potentially  
97 relevant to various environmental, industrial, and medical applications, including fungal  
98 pathogenicity in animals and plants.

99

## 100 Results

### 101 Fungal growth on flat agar surfaces and in closed, non-constraining PSMS geometries

102 The experiments were performed in closed PDMS microfluidics structures comprising  
103 separate chambers for testing the responses of the intracellular mechanisms to confinement  
104 and constraining conditions (a description of the microfluidics experimental structures is  
105 presented in Figure 1, in the Methods section, and in Supplementary Figure SI 01;  
106 representative images of fungal growth in confining/constraining geometries are presented in  
107 Supplementary Figure SI 02). Because the vast majority of studies report on fungal growth  
108 experiments performed on agar, the first step in our study was to establish that the ‘internal’  
109 control in our experiments, i.e., closed, but non-constraining, 100 x 100 x 10µm PDMS-made  
110 chambers, provides comparable growth conditions with those on agar. The three-way  
111 comparison of fungal growth, i.e., on agar, in closed/non-constraining conditions, and  
112 exposed to various level of constraint, respectively, demonstrated that the conditions  
113 associated with the ‘external’ control on agar, and ‘internal’ control in microfluidics  
114 chambers, are similar. Supplementary Information presents a detailed discussion.

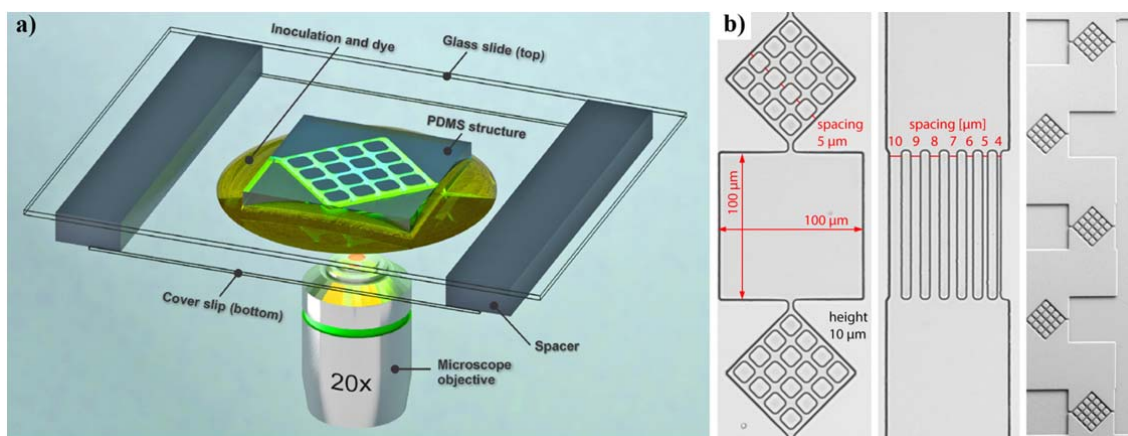

115 **Figure 1.** a) Schematic experimental setup for live-cell imaging of fungal growth in microfluidics  
116 structures on an inverted confocal microscope (not to scale). b) Micrograph images of the PDMS  
117 microfluidics structures constraining fungal growth. Left: chamber probing non-constraining growth  
118 (middle); diamond structure for probing lateral branching in constraining environments (top and  
119 bottom). Middle: channels for probing lateral branching following various constraining levels. Right:  
120 overall image of the entry to the chip, probing the response to collisions at shallow, and near-  
121 orthogonal angles, as well as corner responses.

122 Indeed, hyphal growth behaviour in PDMS non-constraining environments, including  
123 intracellular processes, is similar with that observed during ‘external’ control experiments on  
124 agar (Supplementary Figure SI 02). First, the cross-sectional apical profiles of *Neurospora*  
125 *crassa* hyphae are parabolic and symmetrical (Figure 2a for internal control; Supplementary  
126 Figure SI 04 for external control on agar). Second, the Spitzenkörper is centred at the hyphal  
127 apex (Supplementary Movie SI 01, and Supplementary Figure SI 05), with small periodic  
128 oscillations perpendicular to the growth direction (Supplementary Movie SI 02). Third, the  
129 longitudinal distribution of microtubule orientations is predominantly parallel to the  
130 longitudinal hyphal axis (Figure 2a for internal control; Supplementary Figures SI 04 and SI  
131 06 for external control). For instance, in the apical regions, most microtubules (53%) deviate  
132 by less than 10° from the polarisation axis, and 84% deviate by less than 20°, with an overall  
133 mean deviation angle of  $11.7^\circ \pm 9.5^\circ$  ( $n = 453$  microtubules measured in 20 hyphae, Figure 2b  
134 and Supplementary Movie SI 03). By contrast, in subapical compartments the angular  
135 deviations of microtubules are larger, i.e., 21% microtubules presenting a deviation of less  
136 than 10°, and 46% less than 20°, with an overall mean deviation angle of  $26.8 \pm 20.1^\circ$  ( $n =$   
137  $852$  microtubules measured in 20 hyphae; Figure 2b and Supplementary Movie SI 04). Thus,  
138 the further away from the hyphal apex the microtubules are, the lower their alignment with  
139 the hyphal axis, as also reflected in the broadening of the distribution of microtubule  
140 deviations from the hyphal axis (Figure 2b for internal control; Supplementary Figure SI 04  
141 and SI 06 for external control). A two-tailed test comparing the apical and subapical  
142 distributions of the alignment angles shows that the curves are non-identical ( $p < 0.0001$ ).

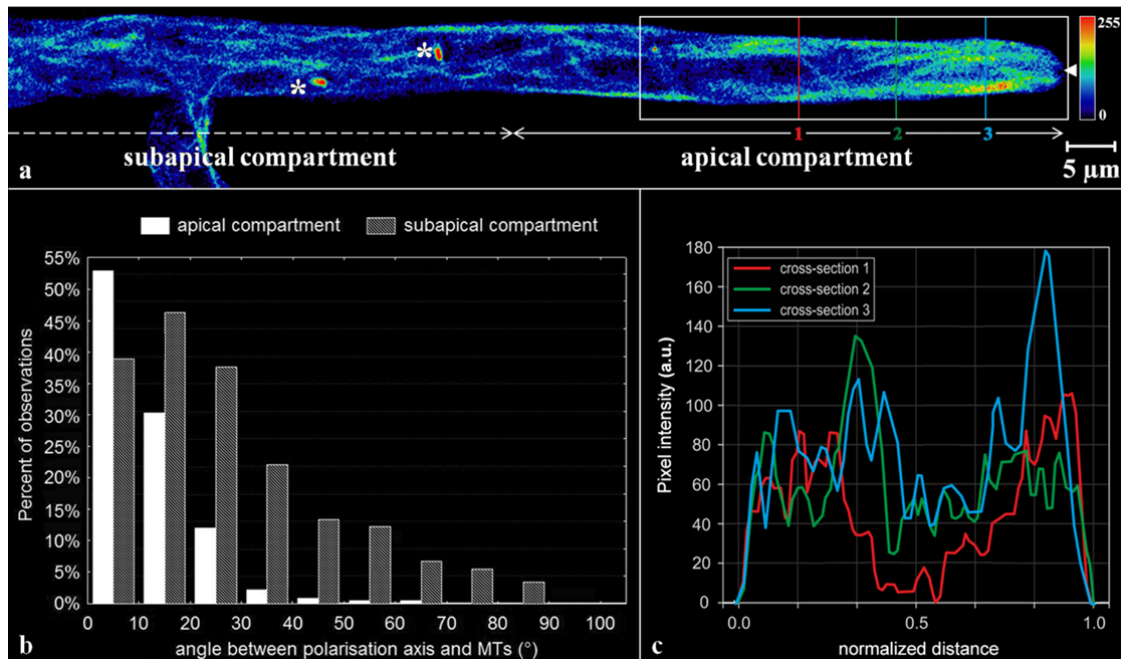

143 **Figure 2.** Spatial distribution of microtubules in *Neurospora crassa* GFP in non-confined  
144 environments. a) Single-plane fluorescence image of the GFP-tagged microtubules within a branched  
145 hypha. The microtubule alignment is predominantly longitudinal in the apical compartment (right) and  
146 less ordered in the subapical region (left). The colours represent the relative spatial density of  
147 microtubules (indicative colour map on the right). The asterisks indicate mitotic spindles, and the solid  
148 white arrowhead at the tip indicates the Spitzenkörper void. b) Histogram of microtubule deviations  
149 from the hyphal polarisation axis in the apical and subapical compartments ( $n = 852$  microtubules  
150 measured in 20 hyphae). Longitudinal orientation is more pronounced in the apical region, where the  
151 microtubules also appear longer. c) Representative profiles of the microtubule density, calculated as  
152 fluorescence pixel intensities, along the vertical lines drawn across the hypha in a). The hyphal  
153 diameter, approximately 7 μm, was normalised to offset small variations at different sections through  
154 the apical compartment.

155 The lateral distribution of microtubules shows that while they populate the entire width of the  
156 fungal hypha, i.e., occupying both cortical and central cytoplasmic regions, the filament  
157 density is higher in the cortical region (Figure 2c for internal control; Supplementary Figure  
158 SI 07 for external control; Supplementary Table SI 02 and Supplementary Figure SI 08  
159 present a statistical comparison between the two controls). The microtubules extend into the  
160 apical dome, displaying a characteristic microtubule-depleted zone in the distal central region  
161 that co-localises with the Spitzenkörper (Supplementary Movie SI 04). Long term imaging,  
162 e.g., between 5 to 10 min, showed that microtubules occasionally traverse the Spitzenkörper  
163 and frequently terminate at the apical cell wall. The estimated microtubule polymerisation rate  
164 is  $26.4 \pm 8.6 \mu\text{m s}^{-1}$  ( $n = 412$  from 98 microtubules).

165 Finally, the lateral branching behaviour is also very similar on agar and in closed/non-  
166 constraining PDMS chambers, i.e., branching at approximately  $45^\circ$  with movement of  
167 microtubules into the daughter hypha (Supplementary Figures SI 09, SI 10 and  
168 Supplementary Movie SI 05), and central position and sizes of the Spitzenkörper  
169 (Supplementary Figures SI 10, SI 11 and SI 12). Additionally, experiments in non-  
170 constraining PDMS chambers enforced the growth of both parental and daughter branches on  
171 the same optical plane.

172

### 173 **Collision with obstacles at shallow angles**

174 We then investigated how imposing geometrical constraints can affect hyphal growth. The  
175 geometry of the test structures (Figure 1b) presents a high density of various obstacles, such  
176 as corners, channels, entries and exits from large chambers, thus providing opportunities for  
177 *Neurospora crassa* hyphae to encounter various physical constraints (also described  
178 before<sup>25,26</sup>). At shallow angles of approach, i.e., lower than  $35^\circ$  relative to the surface, the  
179 hyphae follows the contour of the obstacle, a process denominated as ‘nestling’. Nestling  
180 dynamics in *Neurospora crassa* hyphae (Figure 3, and Supplementary Movie SI 06) presents  
181 in three stages:

182 (i) *Prior to nestling, i.e., prior to encounter with the wall.* As in non-constraining  
183 geometries, the hyphal profile is initially symmetrical and parabolic, with the Spitzenkörper  
184 centrally located at the hyphal apex, and the microtubules are symmetrically distributed. The  
185 consistency of the hyphal morphology prior to wall contact suggests the absence of any  
186 anticipatory, e.g., chemotaxis, sensing mechanism.

187 (ii) *Nestling.* Hyphal morphology changes significantly when encountering a wall. First,  
188 hyphal growth follows the constrained path imposed by the obstacle, i.e., along the wall, in  
189 the direction of least deviation (Figure 3a, Supplementary Figure SI 13, top). Second, the  
190 longitudinal hyphal cross-section lose its parabolic symmetry, and becomes considerably  
191 skewed toward the wall. The hypha thus continues to progress in close contact with the wall,  
192 maintaining this skewed tip profile. Third, the Spitzenkörper markedly shifts away from its  
193 previously central apical location, towards the wall. This displacement persisted over longer  
194 distances, e.g., more than several hyphal diameters (Figure 3b, Supplementary Figure SI 13,  
195 bottom). Fourth, microtubules tend to gather near the inner edge of the hyphal bend (white  
196 arrow in Figure 3a) and towards the wall at the tip (Figure 3a, Supplementary Figure SI 14).

197 (iii) *Return to non-constrained growth.* Upon reaching the end of the wall, the hyphae  
198 quickly recovers their original growth directions, within a distance approximately equivalent  
199 with the hyphal diameter. Additionally, the apex resume its symmetrical parabolic profile, and  
200 the Spitzenkörper simultaneously returns to a central position (Figure 3c; Supplementary  
201 Figure SI 15; Supplementary Movie SI 06 presents the complete time series) while the  
202 microtubules recover their symmetrical distribution.

203 (iv) Within the spatial range of observation, spanning several chambers, each with a length  
204 of  $100 \mu\text{m}$ , the accuracy in the recovery of the growth direction does not diminish over time,

205 i.e., after successive bends through the device, or with the increase in distance from the initial  
206 branching point of the respective hypha (Supplementary Figure SI 16). Skewing of the apex  
207 during nestling is also constant over time.

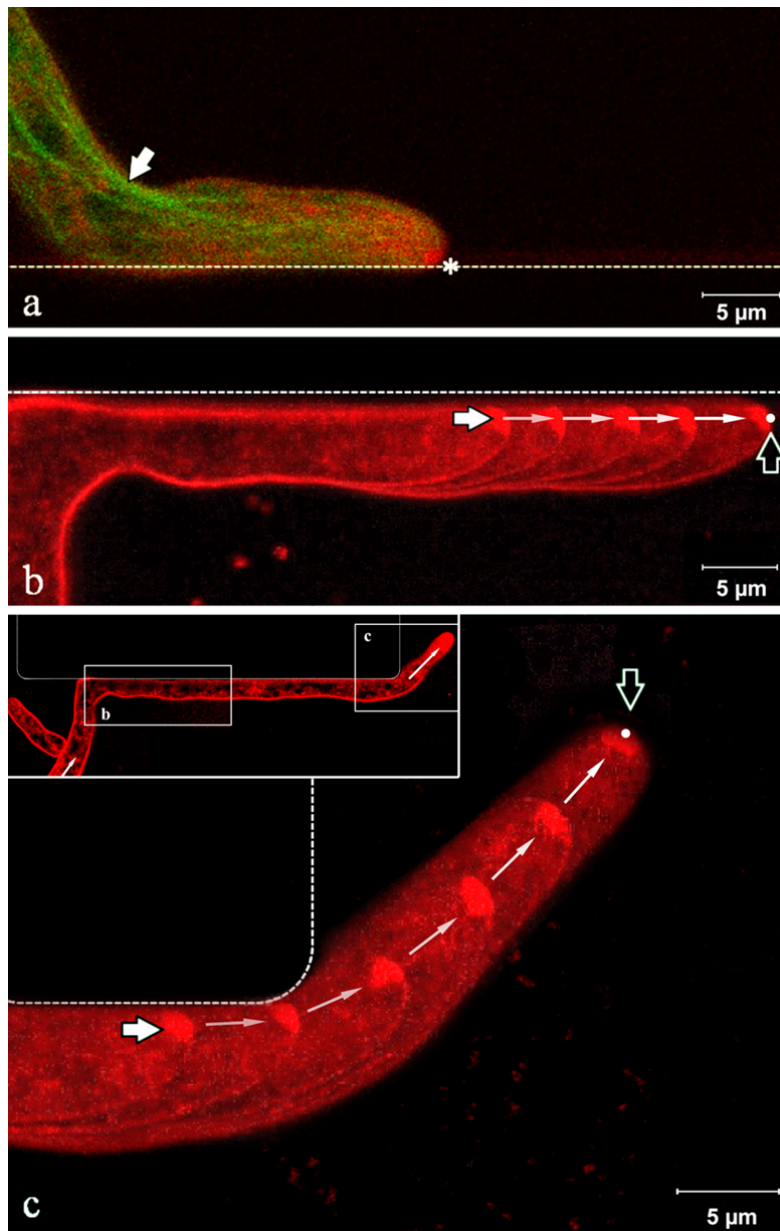

**Figure 3.** Fluorescence images of the Spitzenkörper (labelled with FM4-64, pseudo-coloured red) and microtubules (genetically tagged with GFP, pseudo-coloured green) in somatic *Neurospora crassa* hyphae nestling to a wall. a) Apical hyphal region growing along a PDMS wall (dashed line). The parabolic apex profile is skewed towards the wall. The Spitzenkörper (asterisk) is displaced from its usual central position at the apex as growth is obstructed by the wall. Microtubules follow the shortest path towards the Spitzenkörper (white arrow) and are displaced from the central median of the hypha. b) Trajectory of the Spitzenkörper, along the wall, displaced from the hyphal central axis, during nestling. The image overlays 5 snapshots taken over 4 min. The white and black arrows indicate the beginning, and the end, respectively, of the Spitzenkörper trajectory. c) Upon reaching the end of the wall, the hypha recovers its symmetrical parabolic profile and the Spitzenkörper gradually returns to the apex centre. The image represents an overlay of 6 images taken

247 over 7.5 minutes, with the white, and the black arrows indicating the beginning and the end,  
248 respectively, of the Spitzenkörper trajectory. The images in b) and c) are from the same hypha at  
249 different times, as indicated in the inset of the c) image. The complete sequence of images can be  
250 viewed in Supplementary Movie SI 05.

251 The microtubule preferential distribution towards the wall opposing the direction of growth,  
252 which resulted in specific ‘cutting corners’ patterns, is also present when *Neurospora crassa*  
253 navigates channels that do not excessively constrain them, i.e., channel widths of 5 µm for a  
254 hypha diameter of 5-7 µm (Supplementary Movies SI 07, and SI 08).

255

256

## 257 **Branching induced by frontal collisions**

258 Frontal encounters with a wall, defined as forming an angle greater than 35° relative to the  
259 obstacle surface, causes the splitting of the apices of *Neurospora crassa* hyphae  
260 (Supplementary Figure SI 17). Detailed and repeated imaging of this ‘hit & split’ process (n =  
261 44 encounter events) put in evidence a process sequence with five stages (Figure 4, organised  
262 along stage number; also Supplementary Movie SI 09):

263 (i) *Polarised approach, prior to encounter* (Stage 1, ‘Approach’ in Figure 4a1, b1, c1).  
264 The hypha approaches the wall, similar to the preliminary stage for nestling. The microtubules  
265 are orientated longitudinally, terminating at the apical cell region (Supplementary Figure SI  
266 18, left panel).

267 (ii) *From the moment of encounter until branching* (Stages 2-4, ‘Collision’ in Figure 4a2-  
268 4, b2-4, c2-4).

269 In Stage 2 (Figure 4a2, b2, and c2), the obstacle blocks the extension of the apical cell  
270 in the growth direction. Apart from a slight wall deformation (due to PDMS elasticity),  
271 growth essentially continues orthogonally to the polarisation axis, resulting in lateral bulging  
272 in the apical region. Simultaneously, the microtubules depolymerise, with the filament ends  
273 receding rapidly from the apex (Figure 4c2, Supplementary Figure SI 18, second left panel).  
274 The average distance of filament end recession reached  $7.3 \pm 3.7 \mu\text{m}$  from the obstacle, at  $25$   
275  $\pm 13$  s after the collision. The Spitzenkörper does not retract longitudinally from the apical  
276 dome, but shrinks gradually (Figure 4a2).

277 In Stage 3 (Figure 4a3, b3, and c3), the hyphal profile continues to develop into two  
278 bulges. The total dissolution of the Spitzenkörper occurs towards the end of this phase, i.e.,  $70$   
279  $\pm 40$  s after the initiation of the encounter (Figure 4a3). The microtubules resume their  
280 extension towards the apex, and  $80 \pm 36$  s after collision, the microtubule population is fully  
281 recovered (Figure 4c3, Supplementary Figure SI 18, third left panel).

282 In Stage 4, just before branching is initiated, i.e., during the period when the hypha  
283 does not have a Spitzenkörper, the uniform apical extension continues laterally, following the  
284 constraining geometry, and the microtubules again extend to the extreme apical cell walls.  
285 The flexibility of the microtubules enabled their extension from the parent hypha into the  
286 nascent bulges, which ultimately resulted in extension perpendicular to the initial growth  
287 direction (Figure 4c4, Supplementary Figure SI 18, right panel).

288 (ii) *Branching*. In Stage 5, approximately two minutes after the orthogonal encounter with  
289 the wall, the uniform extension pattern changes to a bidirectional, polarised pattern, with the  
290 bulges reaching  $2.3 \pm 1.3 \mu\text{m}$ . The size of the buds immediately before forming new branches  
291 correlate moderately ( $r = 0.65$ ,  $p < 0.05$ ) with the initial diameter of the parental hypha. This  
292 change in polarisation pattern coincides with the nucleation of two smaller ‘daughter’  
293 Spitzenkörper, one for each new growth direction (Figure 4a5). Additionally, independent  
294 microtubule populations develop within each branch to conclude the branching process  
295 (Figure 4c5).

296 Further evidence of the intracellular processes during the hit & split is provided in  
297 Supplementary Figure SI 19 for the Spitzenkörper trajectory; and in Supplementary Figure SI  
298 20 for both the Spitzenkörper and the microtubules. Supplementary Figure SI 21 presents the  
299 history of the Spitzenkörper following the collision with an obstacle splitting the hypha in two  
300 branches.

301 Importantly, the disappearance of the Spitzenkörper also occurs when the hypha, pressed, then  
302 penetrated a PDMS wall (Supplementary Movie SI 10).

303

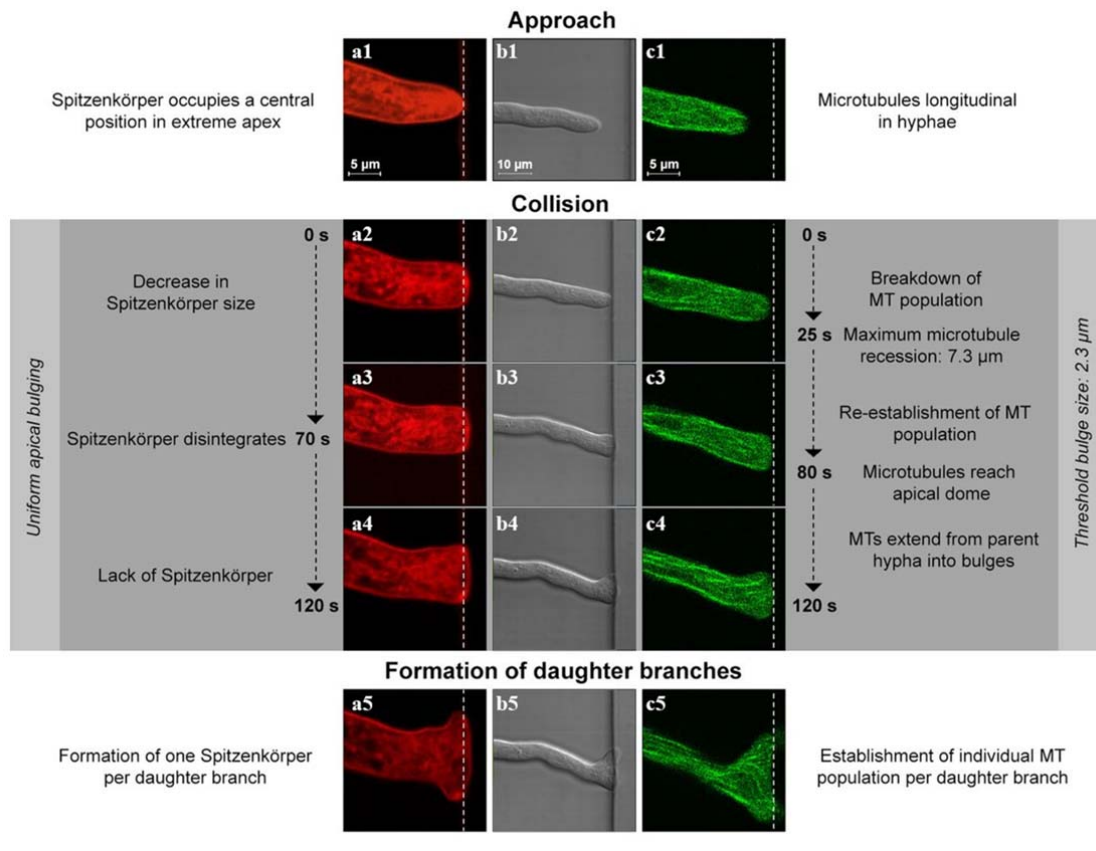

304 **Figure 4.** Stages during frontal obstacle-induced hit & split branching following collision with a  
 305 PDMS wall (white dashed lines). Columns a and c represent the fluorescence images of the  
 306 distributions of the Spitzenkörper (red) and microtubule (green), respectively, and column b represents  
 307 the differential interference contrast image of a hypha. The hypha deforms the elastic PDMS slightly  
 308 from its original position (b3, b4). During the approach (a1, a2), the Spitzenkörper is located at apex  
 309 centre and the microtubules are organised longitudinally (c1, c2). Following the encounter, the  
 310 Spitzenkörper shrinks (a2) and ultimately disappears (a3), and the microtubules temporarily recede  
 311 from the apex region (c3, c4). Concomitantly, the apex grows uniformly (b3, b4). Finally, two new  
 312 Spitzenkörper form in the daughter branches (a5) and the microtubules resume their extension towards  
 313 both apices (c5).

314

### 315 **Lateral branching from tightly constraining channels**

316 *Neurospora crassa* branches with increasing frequency after prolonged bilateral constrain.  
 317 Loose constraint within channels with a width smaller than the hyphal diameter and  
 318 without any side opening prevents branching over the entire channel length, but branching  
 319 occurs almost immediately upon cessation of the confinement, e.g., at a channel opening  
 320 (Supplementary Movie SI 11). However, if lateral openings are presented while a hypha  
 321 passes through a narrow channel (Figure 5, Supplementary Figure SI 22, and Supplementary  
 322 Movie SI 12), the intracellular processes responsible for directional memory and  
 323 confinement-induced branching occur concomitantly.

324 The growth and lateral branching proceeds in three stages (n = 20 hyphae):

325 (i) *Entry and apical growth in the channel* ('Approach' in Figure 4a1, b1, c1). Directional  
 326 memory manifests upon entering the confining channel (Figure 5a1 and b1), with the hypha  
 327 extending along its initial growth direction, without turning into lateral channels. The  
 328 microtubules are orientated longitudinally within the hypha (Figure 5c1).



329 (ii) *Formation of a proto-branch* ('Lateral opening' in Figure 5a2-4, b2-4 and c2-4).  
 330 When the apex encountered an intersection, the subapical hyphal regions gradually extend  
 331 into the lateral opening. This orthogonal extension, aided by the plasticity of the cell wall,  
 332 produces a bulge into the lateral space (Figure 5a2, b2, c2). Whereas the longitudinal  
 333 microtubule orientation is initially preserved (showing no extension into the bulge, even after  
 334 the hyphal apex had passed the lateral opening), at some point polarisation sets in (Figure  
 335 5c3), followed by an extension from the parent hypha into the developing branch (Figure  
 336 5c4). Approximately halfway through this process, this emerging branch forms its own  
 337 Spitzenkörper (Supplementary Figure SI 23).  
 338 (iii) *Development of a stand-alone orthogonal branch* (Figure 5a5, b5, c5). Subsequent  
 339 development is characterised by the formation of an independent population of microtubules  
 340 and an independent daughter hypha (Figure 5c5). Interestingly, features associated with  
 341 directional memory appear early, e.g., the 'cutting of corners' pattern (Figure 5c5). This  
 342 process occurs within only a few minutes from the initial crossing by the parental apex.

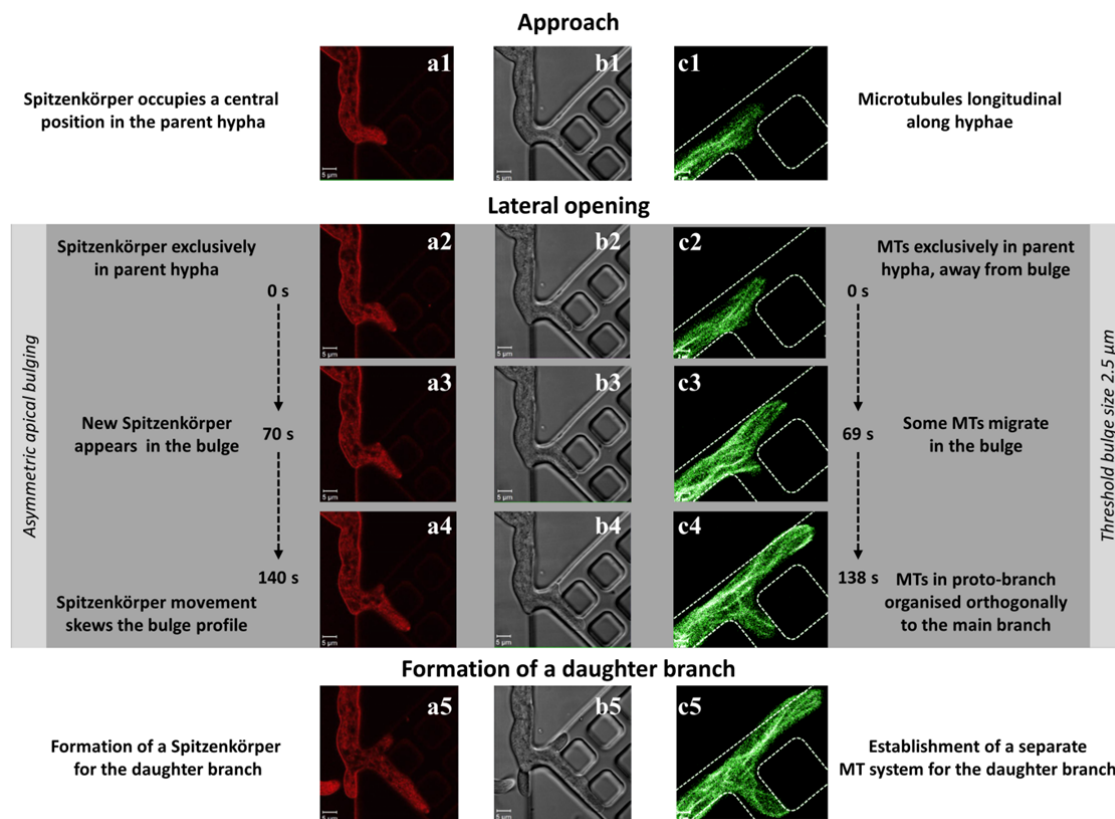

343 **Figure 5.** Stages of hyphal branching into a lateral channel (white dashed lines). Columns a and c  
 344 represent the Spitzenkörper (red) and microtubule (green) distributions, respectively, and column b  
 345 represents the differential interference contrast image of a hypha. The parent branch always preserves  
 346 its Spitzenkörper. The Spitzenkörper is positioned closer to the wall, thus enabling directional  
 347 memory. The formations of the Spitzenkörper and microtubule population in the daughter hypha are  
 348 approximately simultaneous. While the cell wall senses the lateral gap, the formation of the daughter  
 349 hyphae is delayed by the formation of the Spitzenkörper and microtubule population. The parent  
 350 hypha in c) passes the intersection while the daughter branch forms orthogonally (c1-c2).  
 351 Microtubules are initially distributed longitudinally in the parent hypha and do not extend into the  
 352 bulge. Between frames (c3) and (c4), the microtubules start to extend from the parent hypha into the  
 353 bulge, indicating the formation of the daughter hypha. The development of this branch is completed by  
 354 the formation of an independent microtubule population (c5).

355 The directional memory in tightly-constraining environments manifests in the ‘cutting  
356 corners’ pattern for the microtubules in *Neurospora crassa* (Figure 6). Also, following the  
357 growth of a hypha towards a tight corner, the directional memory opposes a U-turn change in  
358 direction of growth, and instead, an orthogonal branch emerges near the apex of the parent  
359 hypha (Supplementary Movie SI 13).

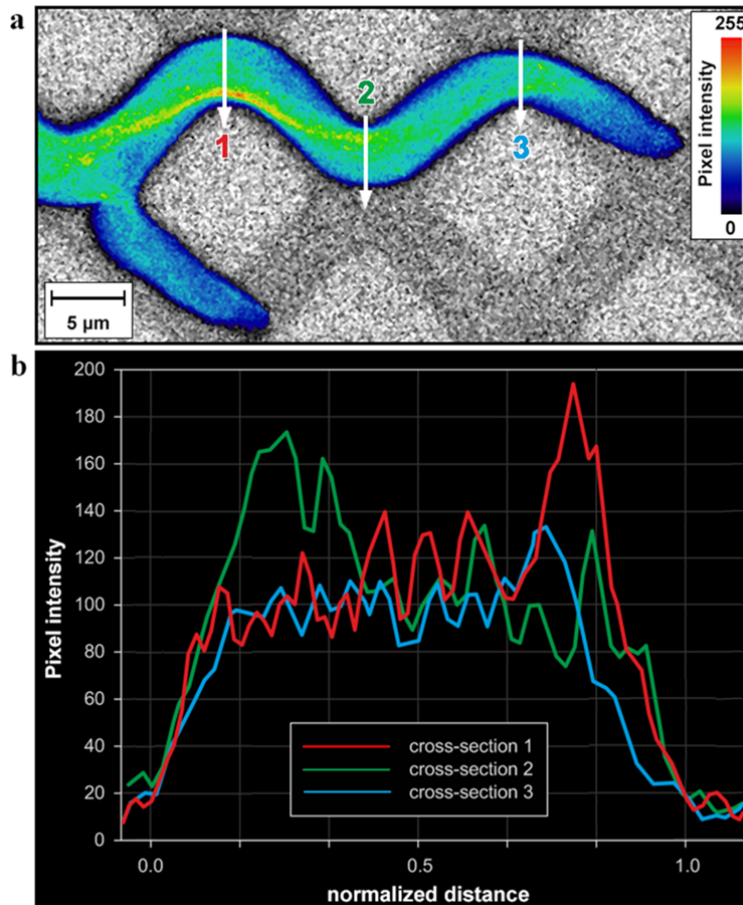

**Figure 6.** Spatial distribution of microtubules in *Neurospora crassa* GFP in confined environments. a) Single-plane fluorescence image of the GFP-tagged microtubules. The microtubule alignment largely follows the initial direction of growth at the entry in confining channels. The colours represent the relative spatial density of microtubules (indicative colour map on the right). b) Profile plot representing the microtubule densities, calculated as fluorescence pixel intensities, along the vertical lines drawn across the hyphal cross-section in a).

Additional evidence of the intracellular processes during the lateral branching in, or immediately after, tightly-constraining environments is provided in the Supplementary Information section: Supplementary

388 Figure SI 22 presents the evolution of the microtubules during lateral branching in  
389 constraining environments, Supplementary Figure SI 23 presents the history of the  
390 Spitzenkörper in the same geometry; and Supplementary Figure SI 24 presents the evolution  
391 of the Spitzenkörper immediately after an exit from a tightly-constraining channel.

392

## 393 Discussion

394 The intracellular mechanisms involved in fungal hyphal extension and branching have been  
395 comprehensively described in the literature, and they are still the subject of elaborate studies.  
396 However, the studies describing these intracellular processes have been so far invariably  
397 based on experiments performed on non-constraining artificial materials, almost always on  
398 flat agar surfaces. While this methodological choice is justified by the experimental  
399 difficulties associated with advanced microscopy, e.g., transparency of the substrate on which  
400 hyphal growth occurs, this experimental framework is dissimilar with many natural habitats of  
401 filamentous fungi, which comprise constraining geometries, and which are expected to  
402 interfere with the mechanisms of fungal growth.

403 Our previous studies, which used the visualization of the growth of filamentous fungi  
404 *Pycnoporus cinnabarinus*<sup>25</sup>, and later *Neurospora crassa*<sup>26,27</sup> in PDMS microfluidics  
405 structures, identified two behavioural traits, i.e., directional memory, and obstacle-induced  
406 branching, which distinguish the growth in confined spaces from that on flat surfaces, and  
407 which were proven to be efficient space-searching strategies.<sup>25,28</sup>

408 To this end, the present study aims to describe the differences, and the similarities between  
409 the intracellular mechanisms for hyphal extension and branching in non-constraining, and in  
410 geometrically constraining environments, respectively. The PDMS microfluidics structures  
411 used in this study enforce different levels of geometrical constraining of the hyphal growth:  
412 (i) virtually no mechanical constraint, in closed, but non-constraining chambers; (ii)  
413 collision with a wall at shallow angles, leading to nestling; (iii) collision with a wall at near  
414 orthogonal angles, leading to ‘hit & split’ branching; and (iv) tight-lateral constraint by  
415 narrow channels presenting either end-of-the-channel openings, or lateral ones.

416

### 417 **Intracellular mechanisms of fungal growth in non-constraining environments**

418 We observed that the hyphal behaviour of *Neurospora crassa* in closed/non-constraining  
419 environments is similar to that observed during our growth experiments on agar, which  
420 correlate well with the reports in the literature. First, in our experiments the hyphae of  
421 *Neurospora crassa* present parabolic and symmetrical cross-sectional apical profiles (Figure  
422 2a, Supplementary Figure SI 04), as also previously demonstrated and comprehensively  
423 described mathematically.<sup>57-59</sup> Second, the central location of the Spitzenkörper at the hyphal  
424 apex (Supplementary Movie SI 01, Supplementary Figure SI 05) was described early in  
425 classical studies.<sup>60</sup> Also, the observed oscillations orthogonal to the growth direction  
426 (Supplementary Movie SI 02) are consistent with previously reported results.<sup>6</sup> Third, the  
427 general orientation of the microtubule parallel to the longitudinal hyphal axis (Figure 2a,  
428 Supplementary Figure SI 06, SI 07, SI 08, and Supplementary Table SI 02), and their  
429 accumulation towards the apical region, correlate well with those observed previously.<sup>38,40,41</sup>  
430 Fourth, the microtubule polymerisation rate ( $26.4 \pm 8.6 \mu\text{m s}^{-1}$ ) is consistent with previously  
431 reported results obtained for hyphal growth on agar.<sup>38</sup>

432 To conclude, a high degree of similarity exists between the growth behaviour and related  
433 intracellular processes, for our experiments in closed/non-constraining chambers, and on agar,  
434 and for results reported in the literature. Consequently, the experiments in large microfluidics  
435 chambers are valid benchmark controls for the further assessment of the constraint on  
436 fungal growth.

437

### 438 **Intracellular mechanisms responsible for directional memory during nestling**

439 In general, the extension of hyphae over a flat surface follows a direction determined at the  
440 initial branching point, usually at an angle of approximately 45° from the parent hypha  
441 (Supplementary Figure SI 09). In contrast, in constraining geometries the hyphae are  
442 obligated to grow in the direction imposed by obstacles, or if space is available, to branch. We  
443 previously showed<sup>25,26</sup> that once the obstacle was overtaken, the hyphae recovered their initial  
444 growth direction to within approximately 20°. This ‘directional memory’ persisted even over  
445 distances longer than ten times the hyphal diameter, regardless of the number of encountered  
446 collisions. Interestingly, the directional memory was demonstrated in both *Pycnoporus*  
447 *cinnabarinus*<sup>25</sup> and *Neurospora crassa*,<sup>26</sup> but not in the cytoskeleton-defective *Neurospora*  
448 *crassa* ro-1 mutant.<sup>26</sup> This observation suggests that the dynamics of cytoskeleton play a  
449 central role in the maintenance of directional memory in constraining geometries.

450 Our results in non-constraining environments, i.e., on agar, or in 100 x 100 x 10  $\mu\text{m}$  PDMS-  
451 made chambers, confirm earlier observations that hyphal growth follows the positions taken  
452 by the Spitzenkörper.<sup>6</sup> However, while this observation remains valid when hyphae overtake  
453 obstacles during nestling, it also requires important qualifications. Indeed, when a hypha  
454 encounters a barrier at shallow angle of contact, thus overtaking the obstacle via sliding, the  
455 Spitzenkörper operates like a compass pointing in the direction the hypha had before the  
456 encounter (Figure 3, Supplementary Movie SI 05, and Supplementary Figure SI 13). One  
457 possible explanation for this, until now unreported, process is that the pressure applied to the  
458 hyphal wall due to the mechanical contact with the obstacle results in an internal signal,  
459 which triggers the consolidation of the hyphal wall in the zone of contact. This process would  
460 require the positioning of the Spitzenkörper off-axis and pressing on the contact point  
461 between the hyphal wall and the obstacle (as confirmed in additional experiments, e.g.,  
462 Supplementary Figure SI 24). Furthermore, the off-axis position of the Spitzenkörper  
463 translates into a skewed architecture of the microtubule cytoskeleton, which present a  
464 characteristic pattern of ‘cutting corners’ (Figure 3a), in particular when the directional  
465 memory manifests in hyphae overtaking corners in a meandered channel (Supplementary  
466 Figures SI 25, SI 26, SI 27 and SI 28; and Supplementary Movie SI 14). This effect is even  
467 more remarkable considering that the microtubules must pass initially and/or eventually  
468 through narrow septa, which are centrally located on the median line of the hypha<sup>61,62</sup>  
469 (Supplementary Figures SI 29, SI 30; and Supplementary Movie SI 15). The synergy between  
470 the compass-like function of the Spitzenkörper, subsequently enforced by the preferential  
471 positioning of the microtubules along a line approximating the initial direction of hyphal  
472 growth, appears to constitute the underlying intracellular mechanism for directional memory,  
473 which was observed for distances at least one magnitude longer than hyphal diameters (the  
474 hyphal trajectories in the Supplementary Movie SI 07 and Movie SI 08 are longer than 100  
475  $\mu\text{m}$ ; and the distances in the Supplementary Figure SI 15 are several hundreds of  $\mu\text{m}$ ).

476 More detailed experiments regarding the role of F-actin structures, i.e., actin rings, patches,  
477 and cables,<sup>46</sup> which are more difficult to visualise than microtubules,<sup>46,47</sup> would reveal their  
478 potential role in directional memory. However, because actin cables are co-localised near the  
479 Spitzenkörper and behind actin rings, it is expected that the role of actin is limited, at least in  
480 the long-range aspect of directional memory.

481

## 482 **Intracellular mechanisms responsible for obstacle-induced branching during hit & split**

483 Our previous experiments with *Neurospora crassa*<sup>26</sup> showed that the constraint effects  
484 affecting fungal growth in various microfluidics structures results in shortening the distance  
485 between hyphal branching points by a factor between 5 and 10 (the growth rate also decreases  
486 ten-fold). We also observed<sup>26</sup> that the branching of *Neurospora crassa* when colliding with an  
487 obstacle at near-orthogonal angles occurred at the apex of the hypha, immediately following  
488 the contact between the hyphae and the constraining structure. This hit & split branching  
489 behaviour contrasts the one presented by *Pycnoporus cinnabarinus*<sup>25</sup>, which branches at a  
490 considerable distance behind the hyphal apex.

491 The observed Spitzenkörper dynamics in hit & split branching presents similarities with the  
492 processes during apical branching of *Neurospora crassa* on agar, which was studied in detail,  
493 using phase contrast video-enhanced light microscopy,<sup>63</sup> and confocal fluorescence  
494 microscopy.<sup>40</sup> For instance, both the disappearance of the parent Spitzenkörper, after a  
495 microtubule contraction from the apex region and the nucleation of the two daughter  
496 Spitzenkörper centres were also observed in the apical branching of *Neurospora crassa* on  
497 agar<sup>63</sup>. More specifically, in internally-triggered apical branching on agar<sup>63</sup> the Spitzenkörper  
498 retracts 12 s after cytoplasmic contraction from the apex which precedes the branching, and

499 disappears after another 47 s. Later, 45 seconds after the start of isotropic, uniform, albeit  
500 slower growth of the parental and daughter hyphae, one Spitzenkörper nucleates, followed by  
501 a second one approximately 7 seconds later, leading eventually to the establishment of two  
502 new branches. By comparison, in our observations of hit & split branching (Figure 4,  
503 Supplementary Figure SI 17, SI 18), the Spitzenkörper is missing for an average time of 50  
504 seconds (n = 44). Moreover, the observed decrease in Spitzenkörper size, its subsequent  
505 disappearance, and the assembly of two new daughter Spitzenkörper centres away from the  
506 parent Spitzenkörper position, form a typical sequence of events that also occurs naturally in  
507 apically branching fungi, e.g., *Sclerotinia sclerotiorum*.<sup>64</sup>

508 The dynamics of the Spitzenkörper in hit & split branching also presents significant  
509 differences when compared with that manifested during branching in non-constraining  
510 environments, both observed in our experiments on agar, and presented in the literature<sup>63</sup>.  
511 First, on homogeneous agar substrates the branching of *Neurospora crassa* hyphae occurs  
512 predominantly laterally, not apically.<sup>63</sup> However, we observed that apical branching is the  
513 prevalent process in hit & split branching. Second, the apical extension stalls during the  
514 absence of a Spitzenkörper in *Sclerotinia sclerotiorum*,<sup>64</sup> and is notably reduced in  
515 *Neurospora crassa* branching apically on agar.<sup>63</sup> In contrast, this delay is not observed in our  
516 experiments with *Neurospora crassa* colliding near-orthogonally with a wall. We attribute  
517 this difference in the extension rates between during hit & split branching, and apical  
518 branching in non-constraining environments, respectively, to different trigger mechanisms.  
519 For example, an apical split can occur on agar few minutes after receiving an intracellular  
520 signal, whereas the immediate response of *Neurospora crassa* following a frontal collision  
521 with an obstacle, as observed in the present study, can be the result of a cascade of very  
522 localised, mechanical contact-induced processes.

523 The behaviour of the microtubules in apical and lateral branching on agar is similar,<sup>40</sup> but it is  
524 markedly different during the hit & split response. In the apical or lateral branching on agar,  
525 the microtubule population is relatively constant throughout the branching process, whereas a  
526 hit & split response appears to trigger microtubule dissolution (Supplementary Figure SI 20,  
527 SI 31). No microtubules are observed to be associated with the cell wall, or to break by  
528 bending. The microtubules disintegrate, which created a gap of a few micrometres between  
529 the microtubule end points and the bulging cell wall. Furthermore, when a hypha encounters a  
530 corner (Supplementary Movie SI 10), branching occurs faster, producing only one branch on  
531 the side of the parent hypha, as allowed by the confining geometry. In this instance, the  
532 resulting budding branch does not display an initially discernible microtubule population,  
533 suggesting that the association of microtubules with the apical cell wall is not a prerequisite  
534 for selecting a branching site, as observed for the lateral branching in non-constraining  
535 environments,<sup>40</sup> but which could be alternatively explained by cell-wall deformation driven  
536 by isotropic turgor pressure.

537 The present study also found that the extension rates of mature hyphae depends on the  
538 microtubule dynamics, as also reported before.<sup>38</sup> However, in contrast to the ‘internal  
539 disruption’ of the microtubule dynamics by mutations,<sup>38</sup> in the present study the dynamics is  
540 disrupted externally by enabling encounters with the constraining geometry. The filaments  
541 respond collectively via an asymmetrical distribution or population breakdown, thereby  
542 disrupting the supply of vesicles to the Spitzenkörper within the apex. This asymmetry is  
543 maintained over a long period during nestling (Supplementary Figure SI 32), but is short-lived  
544 for obstacle-induced breakdown dissolution (Supplementary Figure SI 31). The initiation of  
545 the recruitment sites for the morphological machinery in bilateral constraint and frontal  
546 collision occurs in the absence of clear involvement of microtubules, and instead primarily  
547 through cell-wall deformation. By elimination, turgor pressure is the most likely cause of the  
548 branching that follows hyphal collision with obstacles at near-orthogonal angles.

549 Similarly to nestling, the role of actin in the hit & split branching remains to be established by  
550 further experimentation. However, as it was shown, for two yeast species,<sup>65</sup> and for  
551 *Neurospora crassa*,<sup>66</sup> that actin is not present at the tip of invasive hyphae, i.e., those pressing  
552 against agar, i.e., in conditions similar to our experiments (Supplementary Movie SI 08 and SI  
553 09). Consequently, it is expected that the contribution of actin is minimal to hit & split  
554 branching.

555

### 556 **Overlap of intracellular mechanisms of directional memory and obstacle-induced** 557 **branching during lateral branching**

558 *Neurospora crassa* predominantly branches laterally in non-constraining conditions, e.g., on  
559 flat agar surfaces, as observed in this study, and reported comprehensively in the literature, as  
560 well as in large PDMS chambers. Lateral branching also occurs in tightly-constraining  
561 microfluidics channels, but this process presents both similarities and differences when  
562 compared with the lateral branching on non-constraining conditions.

563 At the beginning of lateral branching in non-constraining geometries, cortical microtubules  
564 are associated with the cell wall at the location of the developing lateral branch. Upon further  
565 extension, the microtubules gather and bent considerably. The severed ends then migrate into  
566 the branch and resume polymerisation. These observations correlate well with those reported  
567 regarding the intracellular processes during lateral branching on flat agar surfaces.<sup>40</sup>  
568 Importantly within the present context, in tightly-constraining channels, the original  
569 Spitzenkörper remains intact in the parental hypha during lateral branching, and a new  
570 Spitzenkörper is created independently within the ‘daughter branch’, which is also observed  
571 in lateral branching in non-constraining conditions.<sup>63</sup>

572 The most evident difference between the lateral branching in tightly-constrained geometries  
573 and that on flat surfaces is that the branching place and frequency is dictated by the  
574 availability of lateral space, rather than triggered by an internal clock, as it appears to be the  
575 case for non-constraining conditions. Moreover, there is a close temporal correlation between  
576 the presence of a constraining geometry and the lateral branching in a tightly-constraining  
577 channel. Also, the growth direction of the lateral branch is enforced by the axis of the  
578 available space for branching, e.g., orthogonal in Figure 6 (also Supplementary Figure SI 22,  
579 SI 23) rather than the usual approximately 45° in non-constraining conditions. These  
580 observations suggest a critical role of the isotropic turgor pressure in initiating the lateral  
581 branching events. Additional evidence suggesting the role of turgor pressure in lateral  
582 branching in our study is that *Neurospora crassa* branches commonly and almost immediately  
583 after an exit from a bottleneck (Supplementary Movie SI\_11),<sup>26</sup> but not *Pycnoporus*  
584 *cinnabarinus*,<sup>25</sup> with a mechanically-strong hyphal wall needed for the penetration of wood  
585 litter.

586 Finally, our findings regarding branching in constraining environments differ from those of a  
587 previous study<sup>38</sup> involving the same genetically tagged *Neurospora crassa* strain, but with  
588 lateral branching occurring on non-constraining flat agar surfaces. In our study, no cortical  
589 microtubules are observed bending or being shattered. Cell-wall deformation precedes  
590 microtubule extension from the parent hypha into the nascent bud, making it appear as the  
591 dominant element in the chain of events leading to branch formation. The bulging of the cell  
592 wall into an intersection of channels also precedes the formation of a daughter Spitzenkörper  
593 (Supporting Figure SI 23), suggesting that Spitzenkörper nucleation occurs after the initiation  
594 of branching.

595 The lateral branching in tightly-constrained channels presents the concomitant play of  
596 directional memory driving the growth of the parental hypha, which is modulated by the

597 Spitzenkörper-microtubules system, and of obstacle-induced branching driving the growth of  
598 the daughter hypha, whose initiation appears to be the result of the turgor pressure  
599 overcoming the mechanical strength of the hyphal wall in locations where the back support of  
600 the constraining wall ceases due to a lateral opening.

601

### 602 **Intracellular mechanisms of directional memory and obstacle-induced branching**

603 The use of time-lapse confocal fluorescence microscopy applied to the observation of growth  
604 of *Neurospora crassa* in various constraining microfluidics environments put in evidence  
605 substantial differences in the intracellular processes involved in the fungal search for available  
606 space for hyphal growth, compared with those manifested in non-constraining conditions.  
607 These differences are summarised in Table 1.

608 The present study shows that the intracellular processes involved in the growth of *Neurospora*  
609 *crassa* in constraining geometries are triggered by the presence of, and modulated by the type  
610 of obstacles encountered by hyphae. Of the two important behavioural traits of *Neurospora*  
611 *crassa* growth in constraining environments<sup>26</sup>, directional memory appears to be the result of  
612 the Spitzenkörper functioning as a compass preserving the initial direction of growth, and  
613 pressing against opposing obstacles encountered at a shallow angle of attack, then returning to  
614 the initial direction when the blocking obstacle is overtaken and the contact with the hypha  
615 ceases. This compass-like dynamic memory is further stabilised by the structuring of the  
616 microtubules in the wake of the trajectory of the Spitzenkörper, resulting in the characteristic  
617 ‘cutting corners’ feature of the microtubule cytoskeleton in meandering channels. Directional  
618 memory, evidenced as a behavioural trait in few fungal species,<sup>25,26</sup> could provide biological  
619 benefits for the filamentous fungi growing and foraging in geometrically heterogeneous  
620 environments. Indeed, stochastic simulations showed that suppressing directional memory in  
621 *Pycnoporus cinnabarinus*<sup>25</sup> increases the probability of hyphae being trapped in a network.  
622 Furthermore, the *Neurospora crassa* ro-1 mutant, which did not display directional memory,  
623 presented a considerably more even distribution of the hyphal mass in networks, and  
624 consequently a considerably lower capacity for exiting from complex geometries than the  
625 wild-type *Neurospora crassa*.<sup>26</sup>

626 In contrast with the intracellular processes involved in directional memory, the Spitzenkörper-  
627 microtubules system does not appear to determine the direction of obstacle-induced  
628 branching. Indeed, in the hit & split events, at the critical point of apical splitting, both the  
629 Spitzenkörper and the microtubules are absent. Furthermore, in lateral branching events  
630 triggered by the availability of lateral free space, during or after tight geometrical  
631 constraint, and although the Spitzenkörper-microtubules system is present in the early  
632 stages of formation of the daughter branch, directional memory is unable to dictate its  
633 direction of growth. Arguably, the only driving force of the extension of the resulting hyphae,  
634 and thus of the obstacle-induced branching, is the isotropic turgor pressure. The presence of  
635 obstacle-induced branching in the same species exhibiting directional memory<sup>25-27</sup> suggests  
636 that this behavioural trait also brings biological benefits. Indeed, stochastic simulations<sup>25</sup>  
637 demonstrated that obstacle-induced branching leads to a higher capacity of evading complex  
638 networks, but with a lesser relative benefit than directional memory. Consequently, it appears  
639 that *Neurospora crassa* has evolved ‘hard wired’ intracellular processes responsible for  
640 directional memory and obstacle-induced branching, respectively, with the former being the  
641 main driver for the negotiation of complex networks, and the latter a fall-back mechanism  
642 when directional memory is turned-off during near-orthogonal collisions, or when it cannot  
643 operate due to the tight constraining in tight geometries.

644

645 **Table 1.** Comparison of intracellular processes involved in the growth of *Neurospora crassa*  
 646 in open and constraining environments. Present study\*. CNC = “confined, but non-constraining”.

| Growth                                                     | Hypha                                                                                                                                                                                                                                                                                   | Spitzenkörper                                                                                                                                                                              | Microtubules                                                                                                                                                                                          |
|------------------------------------------------------------|-----------------------------------------------------------------------------------------------------------------------------------------------------------------------------------------------------------------------------------------------------------------------------------------|--------------------------------------------------------------------------------------------------------------------------------------------------------------------------------------------|-------------------------------------------------------------------------------------------------------------------------------------------------------------------------------------------------------|
| <b>Non-constraining geometries [various references, *]</b> |                                                                                                                                                                                                                                                                                         |                                                                                                                                                                                            |                                                                                                                                                                                                       |
| Single hypha                                               | <u>Profile</u> : parabolic, laterally-symmetrical<br><br><u>Source</u> : agar <sup>57-59,*</sup> and CNC*                                                                                                                                                                               | <u>Location and dynamics</u> : central, at the hyphal apex; permanently present<br><br><u>Source</u> : agar <sup>60,*</sup> and CNC*                                                       | <u>Orientation</u> : parallel to the hyphal axis<br><u>Distribution</u> : axially symmetrical<br><u>Dynamics</u> : population relatively constant<br><u>Source</u> : agar <sup>39-41,*</sup> and CNC* |
| Lateral branching                                          | <u>Occurrence</u> : statistically-regular<br><u>Angle</u> : approx. 45°<br><u>Profiles</u> : parabolic for both parental and daughter hyphae<br><u>Apical extension</u> : reduced during branching<br><u>Source</u> : agar <sup>63</sup> and CNC*                                       | <u>Location and dynamics</u> : central, at the hyphal apices; permanently present in parental hypha, early appearance in the daughter hypha<br><u>Source</u> : agar <sup>63</sup> and CNC* | <u>Orientation</u> : parallel to hyphal axes<br><u>Distribution</u> : axially symmetrical<br><u>Dynamics</u> : population relatively constant<br><u>Source</u> : agar <sup>63</sup> and CNC*          |
| Apical branching                                           | <u>Occurrence</u> : statistically-regular, but rare<br><u>Angle</u> : V-shaped, approx. 45°<br><u>Profiles</u> : initial round-up for the twin hyphae<br><u>Apical extension</u> : reduced during branching<br><u>Source</u> : agar <sup>63</sup>                                       | <u>Location and dynamics</u> : retracts from the apex, disappears, then two Spitzenkörper centres emerge at the centres of hyphal apices<br><br><u>Source</u> : agar <sup>63</sup>         | <u>Orientation</u> : parallel to hyphal axes<br><u>Distribution</u> : axially symmetrical<br><u>Dynamics</u> : population relatively constant<br><br><u>Source</u> : agar <sup>40,67</sup>            |
| <b>Constraining geometries [*]</b>                         |                                                                                                                                                                                                                                                                                         |                                                                                                                                                                                            |                                                                                                                                                                                                       |
| Nestling                                                   | <u>Occurrence</u> : triggered by contact at shallow angles<br><u>Angle</u> : change of direction as dictated by the wall<br><u>Profiles</u> : skewed off-axis, towards the wall<br><u>Apical extension</u> : unchanged                                                                  | <u>Location and dynamics</u> : off-axis location, pressing against the obstacle, return to central position after passing the obstacle                                                     | <u>Orientation</u> : aligned off-axis,<br><u>Distribution</u> : axially asymmetrical, ‘cutting corners’<br><u>Dynamics</u> : population relatively constant                                           |
| Hit & split                                                | <u>Occurrence</u> : triggered by near-orthogonal collisions<br><u>Angle</u> : T-shaped branching, at ~180°<br><u>Profiles</u> : triangular, then progressively parabolic<br><u>Apical extension</u> : constant during splitting                                                         | <u>Location and dynamics</u> : disappears during splitting of parental hypha; then two Spitzenkörper centres form centrally at the apex of twin branches                                   | <u>Orientation</u> : random close to the splitting<br><u>Distribution</u> : random close to the splitting<br><u>Dynamics</u> : substantial dissolution, then formation in twin hyphae                 |
| Branching in/after tightly-constraining channels           | <u>Occurrence</u> : triggered by availability of free space for branching<br><u>Angle</u> : dictated by the geometry<br><u>Profiles</u> : parabolic for parental hyphal circular, then increasingly parabolic for daughter hypha<br><u>Apical extension</u> : constant during branching | <u>Location and dynamics</u> : parental Spitzenkörper progresses unchanged, the daughter hypha forms its own Spitzenkörper early and centrally                                             | <u>Orientation</u> : parallel to the hyphal axes<br><u>Distribution</u> : axially symmetrical<br><u>Dynamics</u> : populations relatively constant                                                    |

647



648 Aside of the interest in the fundamentals of intracellular mechanisms involved in fungal  
649 growth, this study could have further impact in several directions, not exhaustively mentioned  
650 below.

651 • From a methodological perspective, purposefully-designed, optically transparent  
652 PDMS microfluidics structures, in conjunction with advanced microscopy imaging, can be  
653 used in fundamental microbiology studies by triggering, with temporal and spatial precision,  
654 biomolecular events which are modulated by the cellular interaction with the solid  
655 environment. This experimental methodology can be used for the further exploration of other  
656 elements controlling the fungal growth in confined spaces, in particular the role of actin  
657 structures, not covered in the present study.

658 • PDMS-made microfluidic devices can be designed to mimic fungal environments,  
659 with experiments revealing insight relevant to various environmental, industrial, and medical  
660 applications, including fungal pathogenicity in animals and plants. For instance, the PDMS  
661 mechanical strength can be adjusted to allow the estimation of the forces applied by fungi in  
662 various environmental conditions, via the measurement of resultant deformations, as already  
663 demonstrated for yeast.<sup>68</sup> Alternatively, the design of the PDMS structures could mimic the  
664 structure of the walls of the plant or animal tissue to allow the study of fungal invasion.

665 • The confinement imposed on the growth of filamentous fungi can be used for various  
666 approaches of biologically-driven computation. For instance, it was shown<sup>27</sup> that the  
667 genetically-engineered, cytoskeleton defective mutant of *Neurospora crassa*, which produces  
668 short branches preferentially at 90°, can solve orthogonal mazes better than the wild type  
669 *Neurospora crassa*, which is biologically ‘programmed’ to branch at 45°. Furthermore, as the  
670 space searching natural algorithms used by fungi have been demonstrated as being more  
671 efficient than some artificial ones<sup>28</sup>, it is possible to use fungi, either wild type, or better  
672 genetically-engineered, to solve very complex physical networks encoding combinatorial  
673 mathematical problems, as proposed before,<sup>69</sup> and recently demonstrated.<sup>70</sup> Alternatively, the  
674 nuclear dynamics in *Neurospora crassa*<sup>71</sup> could be ‘streamlined’ in networks mimicking real  
675 complex transportation webs, thus allowing the exploration of traffic optimisation,<sup>72,73</sup> a  
676 conceptual framework demonstrated for *Physarum polycephalum*.<sup>74</sup>

677

## 678 **Conclusions**

679 The study of the intracellular processes in somatic hyphae of *Neurospora crassa* that respond  
680 actively to geometrical constraints imposed by a PDMS-based microfluidic structure revealed  
681 how the Spitzenkörper-microtubules system is responsible for the directional memory in  
682 navigating confining networks when hyphae encounter obstacles at shallow angles of contact.  
683 This study also revealed that the Spitzenkörper-microtubules system is not modulating the  
684 obstacle-induced hyphae collide near-orthogonally with obstacles blocking their growth,  
685 suggesting that turgor pressure is the remaining candidate for the driving force. Finally, when  
686 free space becomes available laterally from tightly-constraining channels, Spitzenkörper-  
687 microtubules system-controlled directional memory cannot operate, also leaving turgor  
688 pressure as the last possible driving force for hyphal lateral branching. The present results can  
689 impact on further fundamental studies regarding the intracellular processes driving the fungal  
690 growth in confined environments, and on various environmental, industrial, and medical  
691 applications, as diverse as fungal pathogenicity in plants, animals and humans, to  
692 biologically-driven computation.

693

## 694 **Methods**

### 695 **Microfabrication and experimental setup**

696 The microfluidic network is illustrated in Figure 1 and Supplementary Figure SI 01. Its  
697 dimensions, i.e., height of 10  $\mu\text{m}$ , and channel widths ranging from 2 to 100  $\mu\text{m}$  were  
698 designed to present various level of constraintment to fungal growth, from tight-constraining  
699 in channels with widths smaller than the hyphal diameter, i.e., 5-7  $\mu\text{m}$ , to confined, but non-  
700 constraining chambers, with dimensions of 100 x 100 x 10  $\mu\text{m}$ . The artificial environments  
701 were fabricated using a two-component polymer, poly(dimethylsiloxane) (PDMS, Sylgard  
702 184, Dow Corning) using a well-established procedure.<sup>26</sup> Benefits of using PDMS include  
703 low fabrication costs, non-toxicity, good biocompatibility, chemical inertness, and optical  
704 transparency for wavelengths as low as 280 nm.<sup>75-79</sup> Briefly, the fabrication involved the  
705 moulding of a degassed PDMS mixture of the pre-polymer and curing agent (10:1, w/w) onto  
706 a microstructured silicon wafer, at 65°C for a duration in excess of 8 hours. After  
707 hydrophilisation via exposure to UV/ozone, the PDMS stamps were irreversibly fixed onto a  
708 microscope cover slip. Lateral openings in the structure allowed the introduction of the  
709 growth medium, fungal hyphae, and fluorescent dyes. Fungal inoculation was achieved by  
710 placing an agar plug, extracted from a zone with young hyphae, e.g., the peripheral growth  
711 zone of a colony, upside down next to a lateral channel opening. The device was then attached  
712 to a microscope slide marked with spacers for accurate positioning on a microscope stage.  
713 Hyphal confinement within channels ensured that the hyphae remained within the working  
714 distance of the microscope objective while enabling sufficient gas exchange over long periods  
715 of time, thus avoiding the need for perfusion with oxygenated nutrient broth, as required in  
716 agar.<sup>60,63</sup>

717 The microfluidic network design allowed the investigation of fungal behaviour in the  
718 following scenarios (Supplementary Figure SI 33, from top to bottom): (a) *virtually no*  
719 *mechanical confinement*, wherein hyphae with a diameter of 5-7  $\mu\text{m}$  grow in the 10  $\mu\text{m}$  gap  
720 between the glass coverslip and the PDMS ‘ceiling’), similar to agar; (b) *parallel 1D*  
721 *confinement*, wherein hyphae progress along a wall in the observation plane; (c) *2D*  
722 *confinement*, wherein hyphae grow while being constrained between two walls that are  
723 perpendicular to the observation plane; and (d) *orthogonal or angled 1D confinement*,  
724 wherein hyphae encounter a wall at near-normal incidence. In many instances, the hyphae  
725 encounter the wall at a shallower angle (e.g., 45° or less, relative to the surface), which results  
726 in a parallel 1D confinement. Additionally, in the case of 2D confinement, the channels can  
727 be given various widths and shapes (e.g., straight, zig-zagged, or bent at various angles).

728

## 729 **Fungal species, growth media, staining**

730 The *Neurospora crassa* *rid (RIP4) mat a his-3+::Pccg-1-Bml+sgfp+* mutant strain  
731 (henceforth “*Neurospora crassa GFP*”; FGSC #9519) was obtained from the Fungal Genetics  
732 Stock Center (School of Biological Sciences, University of Missouri, Kansas City, MO,  
733 USA). The *Neurospora crassa GFP* mutant was constructed<sup>41</sup> to express intrinsically GFP-  
734 labelled microtubules while maintaining a growth pattern similar to that of the wild type. The  
735 strain was cultured on 1% w/v malt extract agar (Merck), which was also used for medium  
736 filling the microfluidics structures. Prior to each experiment, the fungal strains were sub-  
737 cultured on fresh malt extract agar plates and incubated at room temperature (21°C  $\pm$  2°C).

738 The FM4-64 dye (Invitrogen Ltd. (Paisley, UK) was used as a marker for Spitzenkörper<sup>80</sup>. A  
739 20- $\mu\text{l}$  droplet of an 8  $\mu\text{M}$  FM4-64 solution was applied onto a microscope coverslip before  
740 placing an agar slab, excised from the margin of the growing colony, upside-down onto the  
741 droplet. To avoid an overlay of the dynamics of the dye loading and of the Spitzenkörper,  
742 imaging was performed at least one hour after loading the hyphae with the dye.

743

#### 744 **Time-lapse microscopy and image analysis**

745 Live-cell imaging of hyphal growth was performed with an inverted laser-scanning  
746 microscope (Zeiss Axio Observer Z1 with LSM 5 Exciter RGB, Carl Zeiss, Göttingen,  
747 Germany) with photomultiplier detectors. Samples were excited with 488 nm and 543 nm  
748 lasers, and the emitted light was passed through a bandpass filter (505-530 nm) and a 650 nm  
749 long-pass filter. To reduce photobleaching and phototoxic effects, the laser intensity and laser  
750 scanning time were kept to a minimum (0.7 - 2.4 % laser energy, 0.75- to 23-second frame  
751 scans). Fluorescence and bright-field time-lapse images were captured simultaneously and  
752 analysed using image processing software (Zen 2008, Carl Zeiss, Göttingen, Germany). Fiji<sup>81</sup>  
753 was used for image overlay and quantitative image analysis. RETRAC 2.10.0.5 (freeware  
754 from Dr. Nick Carter, University of Warwick, UK) was used for frame-by-frame tracking and  
755 calculating cytoskeletal and hyphal kinetics.

756

#### 757 **Growth experiments on agar and microfluidics structures**

758 Control measurements for fungal growth in non-constraining environments were performed  
759 on 1% w/v malt extract media using somatic hyphae at the edges of the colony. The leading  
760 hyphae, i.e., wide hyphae showing rapid cytoplasmic flow,<sup>82</sup> rarely entered the microfluidic  
761 structures and were therefore omitted. For the somatic hyphae, 'subapical compartments'  
762 were characterised by an increased nuclear density approximately 60  $\mu\text{m}$  from the extreme  
763 apex. Hyphal growth rates were established by tracking the position of the extreme hyphal  
764 apices in subsequent frames. To measure the cytoskeletal alignment within hyphae, tangents  
765 were fitted manually to microtubules, and the respective local hyphal longitudinal (i.e.,  
766 polarisation) axes and intersection angles were measured. To measure the rates of microtubule  
767 polymerisation within the apical compartment, the positions of individual filament ends were  
768 tracked frame-by-frame.

769 The parameters of the obstacle-induced apical hit & split included the time elapsed from the  
770 impact to the establishment of the daughter hyphae and the maximum size of the formed  
771 bulges immediately before the re-establishment of polarised growth. The hyphal diameter was  
772 measured at the time of collision with the obstacle. The maximum bulge size was measured  
773 by overlaying the frame of collision with the frame in which the growth pattern of the  
774 daughter bulges changed to polarised extension and determining the difference in the apical  
775 cell wall location on both sides of the hypha.

776

#### 777 **Statistical analysis**

778 Statistica 7.1 (Statsoft Inc., OK, USA) and GraphPad Prism 6.01 (GraphPad Software Inc.,  
779 CA, USA) were used for statistical analysis and correlation tests. Statistical analyses included  
780 calculating the mean and standard deviation values of parameters measured, i.e., position,  
781 alignment with the hyphal axis, polymerisation rate for microtubules, times before  
782 reappearance of the Spitzenkörper, and hyphal bulge dimensions, over the total number  $n$  data  
783 points. Statistical analyses included all accumulated data from at least 20 separate  
784 experiments (unless otherwise stated). GraphPad prism was used to perform a Mann-Whitney  
785 test comparing the apical and subapical distributions of the microtubule polymerisation rates  
786 and the microtubule alignments to the polarisation axis respectively.

787 **Acknowledgements.** Financially supported by the European Union Seventh Framework  
788 Programme (FP7/2007-2011) under Grant Agreements 228971 [Molecular Nano Devices  
789 (MONAD)]; by a Research Project Grant from Leverhulme Trust; and by grants from the  
790 Defense Advanced Research Projects Agency under Grant Agreements N66001-03-1-8913,

791 and HR0011-16-2-0028. We thank Dr. Adam Hendricks, from McGill University, for  
792 insightful suggestions, and Drs. Abraham P. Lee and Lisen Wang, from University of  
793 California, Irvine, for the fabrication of the microfluidics masters.

794 **Author contributions.** MH conceived and conducted the experiments, and performed the  
795 image acquisition and analysis. OK contributed to the image and statistical analyses. CE  
796 contributed to the analysis of the biological data. DVN conceived the experiments,  
797 contributed to the image analysis and coordinated the project. MH and DVN wrote the paper.

798

## 799 References

- 800 1 Fischer, G. Opportunistic filamentous fungi - Species spectrum and abundance in the  
801 human environment. *Umweltmedizin in Forschung und Praxis* **15**, 84-91 (2010).
- 802 2 Fisher, M. C. *et al.* Emerging fungal threats to animal, plant and ecosystem health.  
803 *Nature* **484**, 186-194, doi:10.1038/nature10947 (2012).
- 804 3 Baldrian, P. & Valášková, V. Degradation of cellulose by basidiomycetous fungi.  
805 *FEMS Microbiology Reviews* **32**, 501-521, doi:10.1111/j.1574-6976.2008.00106.x  
806 (2008).
- 807 4 Purahong, W. & Hyde, K. D. Effects of fungal endophytes on grass and non-grass  
808 litter decomposition rates. *Fungal Diversity* **47**, 1-7, doi:10.1007/s13225-010-0083-8  
809 (2011).
- 810 5 Molin, P., Gervais, P., Lemièrre, J. P. & Davet, T. Direction of hyphal growth: a  
811 relevant parameter in the development of filamentous fungi. *Research in Microbiology*  
812 **143**, 777-784, doi:10.1016/0923-2508(92)90106-X (1992).
- 813 6 Riquelme, M., Reynaga-Pena, C. G., Gierz, G. & Bartnicki-Garcia, S. What  
814 Determines Growth Direction in Fungal Hyphae? *Fungal Genetics and Biology* **24**,  
815 101-109 (1998).
- 816 7 Money, N. P. Insights on the mechanics of hyphal growth. *Fungal Biology Reviews*  
817 **22**, 71-76 (2008).
- 818 8 Steinberg, G. Hyphal Growth: a Tale of Motors, Lipids, and the Spitzenkörper.  
819 *Eucaryotic Cell* **6**, 351-360 (2007).
- 820 9 Wessels, J. G. H. Fungi in Their Own Right. *Fungal Genetics and Biology* **27**, 134-  
821 145 (1999).
- 822 10 Prosser, J. I. & Trinci, A. P. J. A model for hyphal growth and branching. *Journal of*  
823 *General Microbiology* **111**, 153-164 (1979).
- 824 11 Trinci, A. P. J. A study of the kinetics of hyphal extension and branch initiation of  
825 fungal mycelia. *Journal of General Microbiology* **81**, 225-236 (1974).
- 826 12 Harris, S. D. Branching of fungal hyphae: regulation, mechanisms and comparison  
827 with other branching systems. *Mycologia* **100**, 823-832, doi:10.3852/08-177 (2008).
- 828 13 Bottone, E. J., Nagarsheth, N. & Chiu, K. Evidence of self-inhibition by filamentous  
829 fungi accounts for unidirectional hyphal growth in colonies. *Canadian Journal of*  
830 *Microbiology* **44**, 390-393, doi:10.1139/cjm-44-4-390 (1998).
- 831 14 Indermitte, C., Liebling, T. M. & Clémençon, H. Culture analysis and external  
832 interaction models of mycelial growth. *Bulletin of Mathematical Biology* **56**, 633-664,  
833 doi:10.1007/BF02460715 (1994).
- 834 15 Blainey, P. C. The future is now: Single-cell genomics of bacteria and archaea. *FEMS*  
835 *Microbiology Reviews* **37**, 407-427, doi:10.1111/1574-6976.12015 (2013).
- 836 16 Hol, F. J. H. & Dekker, C. Zooming in to see the bigger picture: Microfluidic and  
837 nanofabrication tools to study bacteria. *Science* **346**, doi:10.1126/science.1251821  
838 (2014).
- 839 17 Gupta, K. *et al.* Lab-on-a-chip devices as an emerging platform for stem cell biology.  
840 *Lab on a Chip - Miniaturisation for Chemistry and Biology* **10**, 2019-2031,  
841 doi:10.1039/c004689b (2010).
- 842 18 Vunjak-Novakovic, G. & Scadden, D. T. Biomimetic platforms for human stem cell  
843 research. *Cell Stem Cell* **8**, 252-261, doi:10.1016/j.stem.2011.02.014 (2011).

- 844 19 Agudelo, C., Packirisamy, M. & Geitmann, A. Influence of Electric Fields and  
845 Conductivity on Pollen Tube Growth assessed via Electrical Lab-on-Chip. *Scientific*  
846 *Reports* **6**, doi:10.1038/srep19812 (2016).
- 847 20 Agudelo, C. G. *et al.* TipChip: A modular, MEMS-based platform for experimentation  
848 and phenotyping of tip-growing cells. *Plant Journal* **73**, 1057-1068,  
849 doi:10.1111/tpj.12093 (2013).
- 850 21 Geng, T. *et al.* Compartmentalized microchannel array for high-throughput analysis of  
851 single cell polarized growth and dynamics. *Scientific Reports* **5**,  
852 doi:10.1038/srep16111 (2015).
- 853 22 Mirzaei, M. *et al.* Microfluidic perfusion system for culturing and imaging yeast cell  
854 microarrays and rapidly exchanging media. *Lab on a Chip - Miniaturisation for*  
855 *Chemistry and Biology* **10**, 2449-2457, doi:10.1039/c004857g (2010).
- 856 23 Xu, L., Lee, H., Jetta, D. & Oh, K. W. Vacuum-driven power-free microfluidics utilizing  
857 the gas solubility or permeability of polydimethylsiloxane (PDMS). *Lab on a Chip -*  
858 *Miniaturisation for Chemistry and Biology* **15**, 3962-3979, doi:10.1039/c5lc00716j  
859 (2015).
- 860 24 Stanley, C. E., Grossmann, G., Casadevall Solvas, X. & DeMello, A. J. Soil-on-a-  
861 Chip: Microfluidic platforms for environmental organismal studies. *Lab on a Chip -*  
862 *Miniaturisation for Chemistry and Biology* **16**, 228-241, doi:10.1039/c5lc01285f  
863 (2016).
- 864 25 Hanson, K. L. *et al.* Fungi use effective algorithms for the exploration of microfluidic  
865 networks. *Small* **2**, 1212-1220 (2006).
- 866 26 Held, M., Edwards, C. & Nicolau, D. V. Probing the growth dynamics of *Neurospora*  
867 *crassa* with microfluidic structures. *Fungal Biology* **115**, 493-505 (2011).
- 868 27 Held, M., Lee, A. P., Edwards, C. & Nicolau, D. V. Microfluidics structures for probing  
869 the dynamic behaviour of filamentous fungi. *Microelectronic Engineering* **87**, 786-789  
870 (2010).
- 871 28 Asenova, E., Lin, H. Y., Fu, E., Nicolau, D. V. & Nicolau, D. V. Optimal fungal space  
872 searching algorithms. *IEEE Transactions on Nanobioscience* **15**, 613-618,  
873 doi:10.1109/TNB.2016.2567098 (2016).
- 874 29 Asenova, E., Lin, H.-Y., Fu, E., Nicolau Jr., D. V. & Nicolau, D. V. Optimal Fungal  
875 Space Searching Algorithms. *IEEE Transactions on Nanobioscience* **15**, 1-7,  
876 doi:10.1109/TNB.2015.2393052 (2016).
- 877 30 Lew, R. R. How does a hypha grow? the biophysics of pressurized growth in fungi.  
878 *Nature Reviews Microbiology* **9**, 509-518, doi:10.1038/nrmicro2591 (2011).
- 879 31 Riquelme, M. *et al.* Architecture and development of the *Neurospora crassa* hypha –  
880 a model cell for polarized growth. *Fungal Biology* **115**, 446-474,  
881 doi:<http://dx.doi.org/10.1016/j.funbio.2011.02.008> (2011).
- 882 32 Bartnicki-Garcia, S., Bartnicki, D. D., Gierz, G., López-Franco, R. & Bracker, C. E.  
883 Evidence That Spitzenkörper Behavior Determines the Shape of a Fungal Hypha: A  
884 Test of the Hyphoid Model. *Experimental Mycology* **19**, 153-159 (1995).
- 885 33 Bracker, C. E., Murphy, D. J. & Lopez-Franco, R. in *Functional Imaging and Optical*  
886 *Manipulation of Living Cells*. 1 edn 67-80 (SPIE).
- 887 34 Fischer-Parton, S. *et al.* Confocal microscopy of FM4-64 as a tool for analysing  
888 endocytosis and vesicle trafficking in living fungal hyphae. *Journal Of Microscopy*  
889 **198**, 246-259 (2000).
- 890 35 Girbardt, M. Die Ultrastruktur der Apikalregion von Pilzhyphen. *Protoplasma* **67**, 413-  
891 441 (1969).
- 892 36 Harris, S. D. *et al.* Polarisome Meets Spitzenkörper: Microscopy, Genetics, and  
893 Genomics Converge. *Eukaryotic Cell* **4**, 225-229 (2005).
- 894 37 Verdín, J., Bartnicki-Garcia, S. & Riquelme, M. Functional stratification of the  
895 Spitzenkörper of *Neurospora crassa*. *Molecular Microbiology* **74**, 1044-1053,  
896 doi:10.1111/j.1365-2958.2009.06917.x (2009).
- 897 38 Uchida, M., Mouriño-Pérez, R. R., Freitag, M., Bartnicki-García, S. & Roberson, R. W.  
898 Microtubule dynamics and the role of molecular motors in *Neurospora crassa*. *Fungal*  
899 *Genetics and Biology* **45**, 683-692 (2008).

- 900 39 Horio, T. Role of microtubules in tip growth of fungi. *Journal of Plant Research* **120**,  
901 53-60, doi:10.1007/s10265-006-0043-2 (2007).
- 902 40 Mouriño-Pérez, R. R., Roberson, R. W. & Bartnicki-García, S. Microtubule dynamics  
903 and organization during hyphal growth and branching in *Neurospora crassa*. *Fungal*  
904 *Genetics and Biology* **43**, 389-400 (2006).
- 905 41 Freitag, M., Hickey, P. C., Raju, N. B., Selker, E. U. & Read, N. D. GFP as a tool to  
906 analyze the organization, dynamics and function of nuclei and microtubules in  
907 *Neurospora crassa*. *Fungal Genetics and Biology* **41**, 897-910 (2004).
- 908 42 Hyde, G. J., Davies, D., Perasso, L., Cole, L. & Ashford, A. E. Microtubules, but not  
909 actin microfilaments, regulate vacuole motility and morphology in hyphae of *Pisolithus*  
910 *tinctorius*. *Cell Motility and the Cytoskeleton* **42**, 114-124, doi:10.1002/(SICI)1097-  
911 0169(1999)42:2<114::AID-CM3>3.0.CO;2-N (1999).
- 912 43 Cassimeris, L., Pryer, N. K. & Salmon, E. D. Real-time observations of microtubule  
913 dynamic instability in living cells. *The Journal of Cell Biology* **107**, 2223-2231,  
914 doi:10.1083/jcb.107.6.2223 (1988).
- 915 44 Schultzhaus, Z., Quintanilla, L., Hilton, A. & Shaw, B. D. Live Cell Imaging of Actin  
916 Dynamics in the Filamentous Fungus *Aspergillus nidulans*. *Microscopy and*  
917 *Microanalysis* **22**, 264-274, doi:10.1017/S1431927616000131 (2016).
- 918 45 Bergs, A., Ishitsuka, Y., Evangelinos, M., Nienhaus, G. U. & Takeshita, N. Dynamics  
919 of actin cables in polarized growth of the filamentous fungus *Aspergillus nidulans*.  
920 *Frontiers in Microbiology* **7**, doi:10.3389/fmicb.2016.00682 (2016).
- 921 46 Takeshita, N., Manck, R., Grün, N., de Vega, S. H. & Fischer, R. Interdependence of  
922 the actin and the microtubule cytoskeleton during fungal growth. *Current Opinion in*  
923 *Microbiology* **20**, 34-41, doi:10.1016/j.mib.2014.04.005 (2014).
- 924 47 Berepiki, A., Lichius, A. & Read, N. D. Actin organization and dynamics in filamentous  
925 fungi. *Nature Reviews Microbiology* **9**, 876-887, doi:10.1038/nrmicro2666 (2011).
- 926 48 Kopecká, M., Kawamoto, S. & Yamaguchi, M. A new F-actin structure in fungi: Actin  
927 ring formation around the cell nucleus of *Cryptococcus neoformans*. *Journal of*  
928 *Electron Microscopy* **62**, 295-301, doi:10.1093/jmicro/dfs074 (2013).
- 929 49 Berepiki, A., Lichius, A., Shoji, J.-Y., Tilsner, J. & Read, N. D. F-Actin Dynamics in  
930 *Neurospora crassa*. *Eukaryotic Cell* **9**, 547-557, doi:10.1128/ec.00253-09 (2010).
- 931 50 Lichius, A., Berepiki, A. & Read, N. D. Form follows function - The versatile fungal  
932 cytoskeleton. *Fungal Biology* **115**, 518-540 (2011).
- 933 51 Seiler, S. & Plamann, M. The Genetic Basis of Cellular Morphogenesis in the  
934 Filamentous Fungus *Neurospora crassa*. *Mol. Biol. Cell* **14**, 4352-4364,  
935 doi:10.1091/mbc.E02-07-0433 (2003).
- 936 52 Steinberg, G. & Schuster, M. The dynamic fungal cell. *Fungal Biology Reviews* **25**,  
937 14-37 (2011).
- 938 53 Chen, L. Y. *et al.* The Arabidopsis alkaline ceramidase TOD1 is a key turgor pressure  
939 regulator in plant cells. *Nature Communications* **6**, doi:10.1038/ncomms7030 (2015).
- 940 54 Howard, R. J., Ferrari, M. A., Roach, D. H. & Money, N. P. Penetration of hard  
941 substrates by a fungus employing enormous turgor pressures. *Proceedings of the*  
942 *National Academy of Sciences of the United States of America* **88**, 11281-11284  
943 (1991).
- 944 55 Money, N. P. & Howard, R. J. Confirmation of a link between fungal pigmentation,  
945 turgor pressure, and pathogenicity using a new method of turgor measurement.  
946 *Fungal Genetics and Biology* **20**, 217-227, doi:10.1006/fgbi.1996.0037 (1996).
- 947 56 Ortega, J. K. E., Munoz, C. M., Blakley, S. E., Truong, J. T. & Ortega, E. L. Stiff  
948 mutant genes of *Phycomyces* affect turgor pressure and wall mechanical properties  
949 to regulate elongation growth rate. *Frontiers in Plant Science* **3**,  
950 doi:10.3389/fpls.2012.00099 (2012).
- 951 57 Bartnicki-Garcia, S., Bracker, C. E., Gierz, G., López-Franco, R. & Haisheng, L.  
952 Mapping the growth of fungal hyphae: Orthogonal cell wall expansion during tip  
953 growth and the role of turgor. *Biophysical Journal* **79**, 2382-2390 (2000).

- 954 58 Gierz, G. & Bartnicki-Garcia, S. A three-dimensional model of fungal morphogenesis  
955 based on the vesicle supply center concept. *Journal of Theoretical Biology* **208**, 151-  
956 164, doi:10.1006/jtbi.2000.2209 (2001).
- 957 59 Reynaga-Pena, C. G., Gierz, G. & Bartnicki-Garcia, S. Analysis of the role of the  
958 Spitzenkörper in fungal morphogenesis by computer simulation of apical branching in  
959 *Aspergillus niger*. *Proceedings of the National Academy of Sciences of the United*  
960 *States of America* **94**, 9096-9101, doi:10.1073/pnas.94.17.9096 (1997).
- 961 60 López-Franco, R. & Bracker, C. Diversity and dynamics of the Spitzenkörper in  
962 growing hyphal tips of higher fungi. *Protoplasma* **195**, 90-111,  
963 doi:10.1007/bf01279189 (1996).
- 964 61 Pieuchot, L. *et al.* Cellular Subcompartments through Cytoplasmic Streaming.  
965 *Developmental Cell* **34**, 410-420, doi:<http://dx.doi.org/10.1016/j.devcel.2015.07.017>  
966 (2015).
- 967 62 Held, M., Edwards, C. & Nicolau, D. V. in *Progress in Biomedical Optics and Imaging*  
968 *- Proceedings of SPIE*.
- 969 63 Riquelme, M. & Bartnicki-Garcia, S. Key differences between lateral and apical  
970 branching in hyphae of *Neurospora crassa*. *Fungal Genetics and Biology* **41**, 842-851  
971 (2004).
- 972 64 Fischer-Parton, S. *et al.* Confocal microscopy of FM4-64 as a tool for analysing  
973 endocytosis and vesicle trafficking in living fungal hyphae. *Journal of Microscopy* **198**,  
974 246-259, doi:10.1046/j.1365-2818.2000.00708.x (2000).
- 975 65 Walker, S. K., Chitcholtan, K., Yu, Y., Christenhusz, G. M. & Garrill, A. Invasive  
976 hyphal growth: An F-actin depleted zone is associated with invasive hyphae of the  
977 oomycetes *Achlya bisexualis* and *Phytophthora cinnamomi*. *Fungal Genetics and*  
978 *Biology* **43**, 357-365, doi:10.1016/j.fgb.2006.01.004 (2006).
- 979 66 Suei, S. & Garrill, A. An F-actin-depleted zone is present at the hyphal tip of invasive  
980 hyphae of *Neurospora crassa*. *Protoplasma* **232**, 165-172, doi:10.1007/s00709-008-  
981 0289-8 (2008).
- 982 67 Potapova, T. V., Boitzova, L. Y., Golyshev, S. A. & Popinako, A. V. The Organization  
983 of mitochondria in growing hyphae of *Neurospora crassa*. *Cell and Tissue Biology* **8**,  
984 166-174, doi:10.1134/S1990519X14020072 (2014).
- 985 68 Minc, N., Boudaoud, A. & Chang, F. Mechanical Forces of Fission Yeast Growth.  
986 *Current Biology* **19**, 1096-1101, doi:10.1016/j.cub.2009.05.031 (2009).
- 987 69 Nicolau, D. V. *et al.* Molecular motors-based micro- and nano-biocomputation  
988 devices. *Microelectronic Engineering* **83**, 1582-1588, doi:10.1016/j.mee.2006.01.198  
989 (2006).
- 990 70 Nicolau, D. V. *et al.* Parallel computation with molecular-motor-propelled agents in  
991 nanofabricated networks. *Proceedings of the National Academy of Sciences of the*  
992 *United States of America* **113**, 2591-2596, doi:10.1073/pnas.1510825113 (2016).
- 993 71 Roper, M., Simonin, A., Hickey, P. C., Leeder, A. & Glass, N. L. Nuclear dynamics in  
994 a fungal chimera. *Proceedings of the National Academy of Sciences of the United*  
995 *States of America* **110**, 12875-12880, doi:10.1073/pnas.1220842110 (2013).
- 996 72 Heaton, L. *et al.* Analysis of fungal networks. *Fungal Biology Reviews* **26**, 12-29,  
997 doi:10.1016/j.fbr.2012.02.001 (2012).
- 998 73 Bebber, D. P., Hynes, J., Darrah, P. R., Boddy, L. & Fricker, M. D. Biological solutions  
999 to transport network design. *Proceedings of the Royal Society B: Biological Sciences*  
1000 **274**, 2307-2315, doi:10.1098/rspb.2007.0459 (2007).
- 1001 74 Tero, A. *et al.* Rules for biologically inspired adaptive network design. *Science* **327**,  
1002 439-442, doi:10.1126/science.1177894 (2010).
- 1003 75 Desai, T. A. Micro- and nanoscale structures for tissue engineering constructs.  
1004 *Medical Engineering and Physics* **22**, 595-606 (2000).
- 1005 76 DiLuzio, W. R. *et al.* *Escherichia coli* swim on the right-hand side. *Nature* **435**, 1271-  
1006 1274 (2005).
- 1007 77 Mondal, S., Ahlawat, S., Rau, K., Venkataraman, V. & Koushika, S. P. Imaging in vivo  
1008 Neuronal Transport in Genetic Model Organisms Using Microfluidic Devices. *Traffic*  
1009 **12**, 372-385, doi:10.1111/j.1600-0854.2010.01157.x (2011).

- 1010 78 Park, S. *et al.* From the Cover: Influence of topology on bacterial social interaction.  
1011 *Proceedings of the National Academy of Sciences* **100**, 13910-13915,  
1012 doi:10.1073/pnas.1935975100 (2003).
- 1013 79 Kim, H. J., Huh, D., Hamilton, G. & Ingber, D. E. Human gut-on-a-chip inhabited by  
1014 microbial flora that experiences intestinal peristalsis-like motions and flow. *Lab on a*  
1015 *Chip* **12**, 2165-2174 (2012).
- 1016 80 Araujo-Palomares, C. L., Riquelme, M. & Castro-Longoria, E. The polarisome  
1017 component SPA-2 localizes at the apex of *Neurospora crassa* and partially  
1018 colocalizes with the Spitzenkörper. *Fungal Genetics and Biology* **46**, 551-563,  
1019 doi:10.1016/j.fgb.2009.02.009 (2009).
- 1020 81 Schindelin, J. *et al.* Fiji: An open-source platform for biological-image analysis. *Nature*  
1021 *Methods* **9**, 676-682, doi:10.1038/nmeth.2019 (2012).
- 1022 82 Steele, G. C. & Trinci, A. P. J. Morphology and Growth Kinetics of Hyphae of  
1023 Differentiated and Undifferentiated Mycelia of *Neurospora crassa*. *Journal of General*  
1024 *Microbiology* **91**, 362-368, doi:10.1099/00221287-91-2-362 (1975).
- 1025



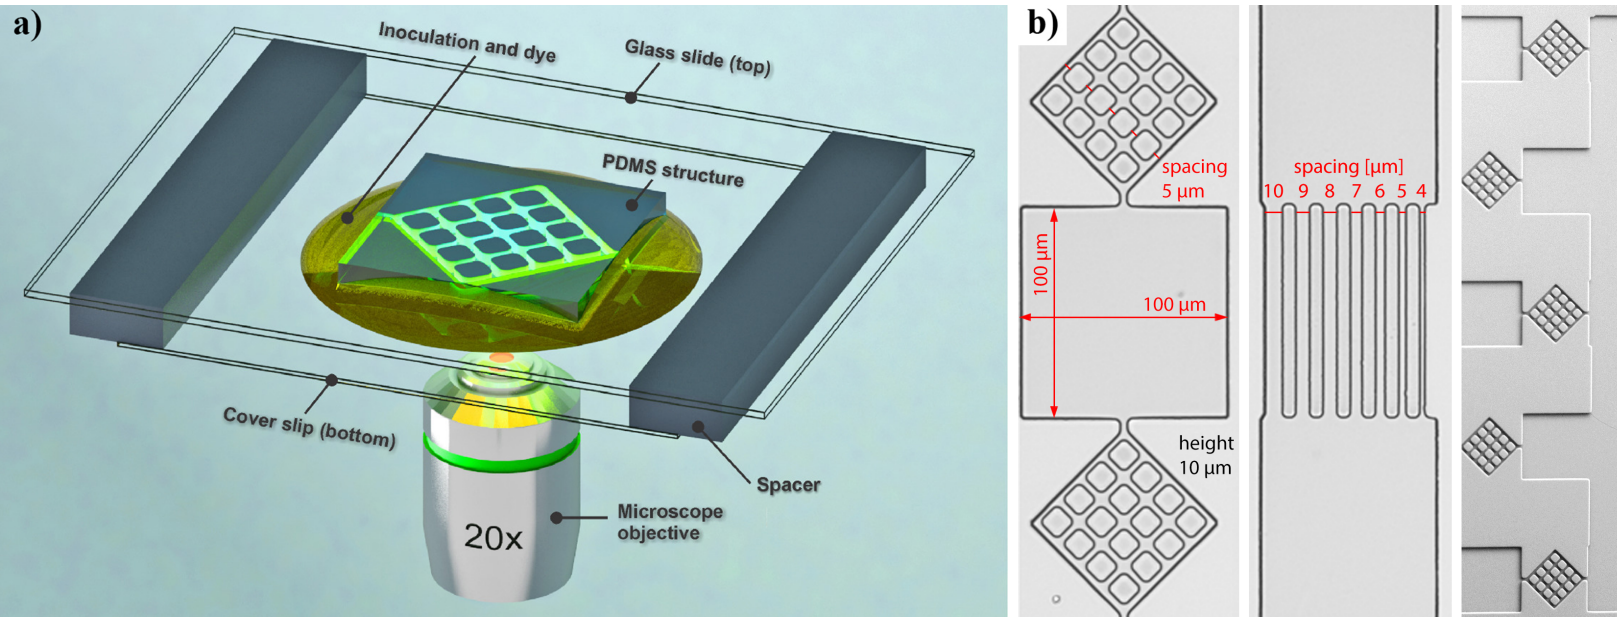

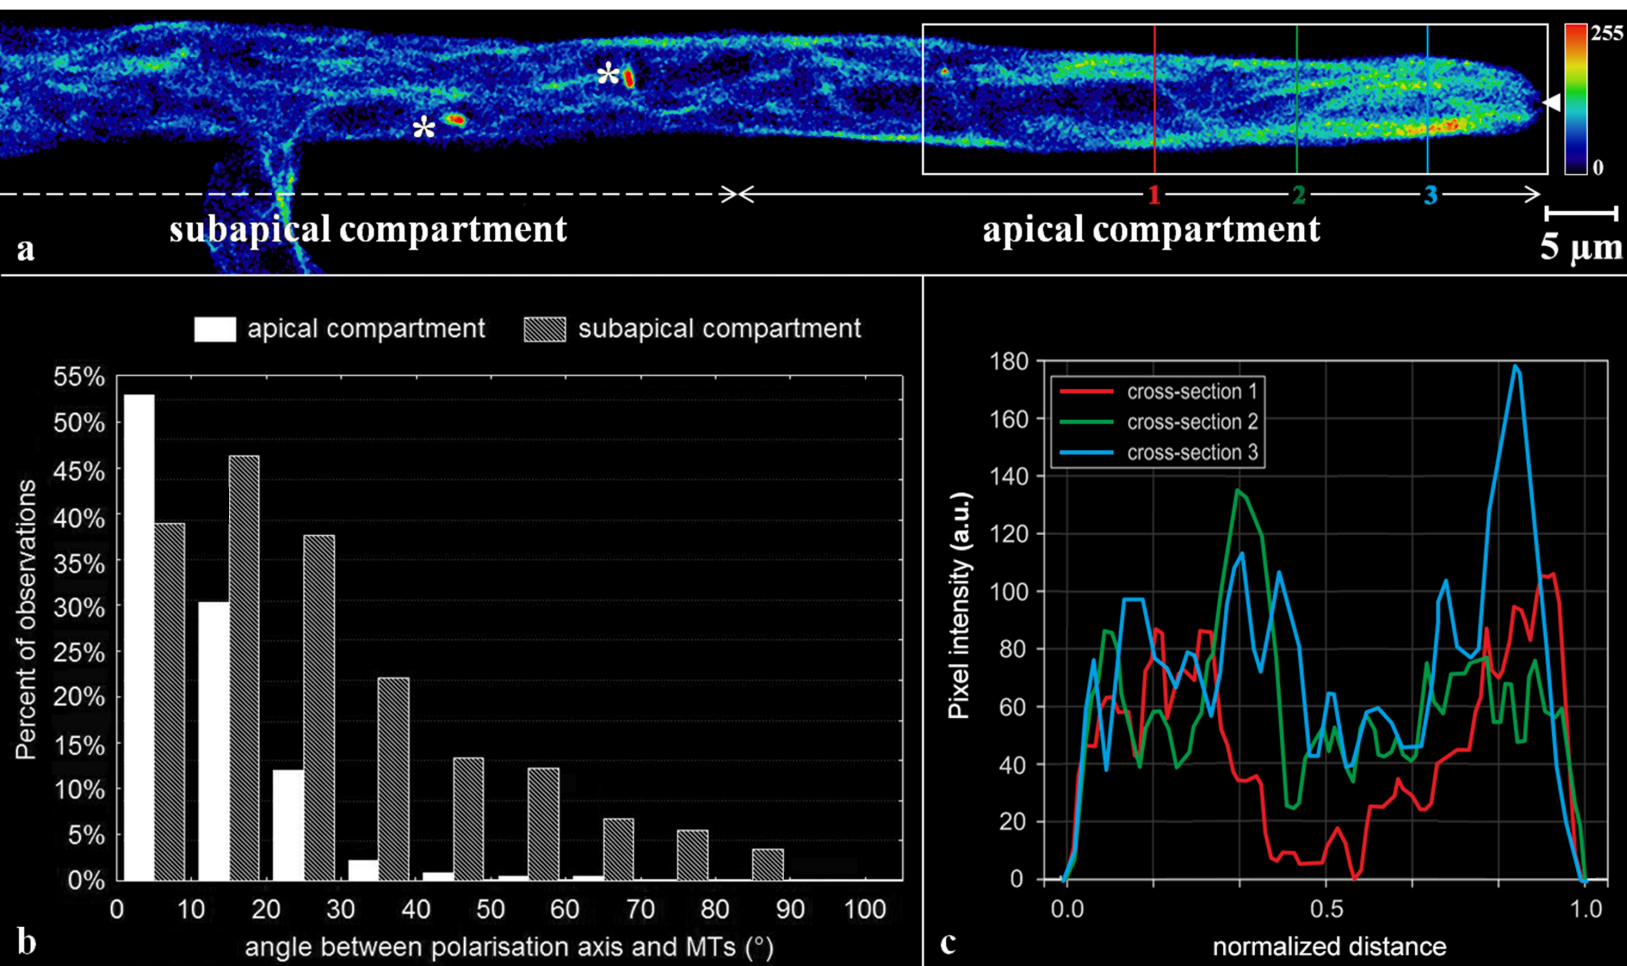

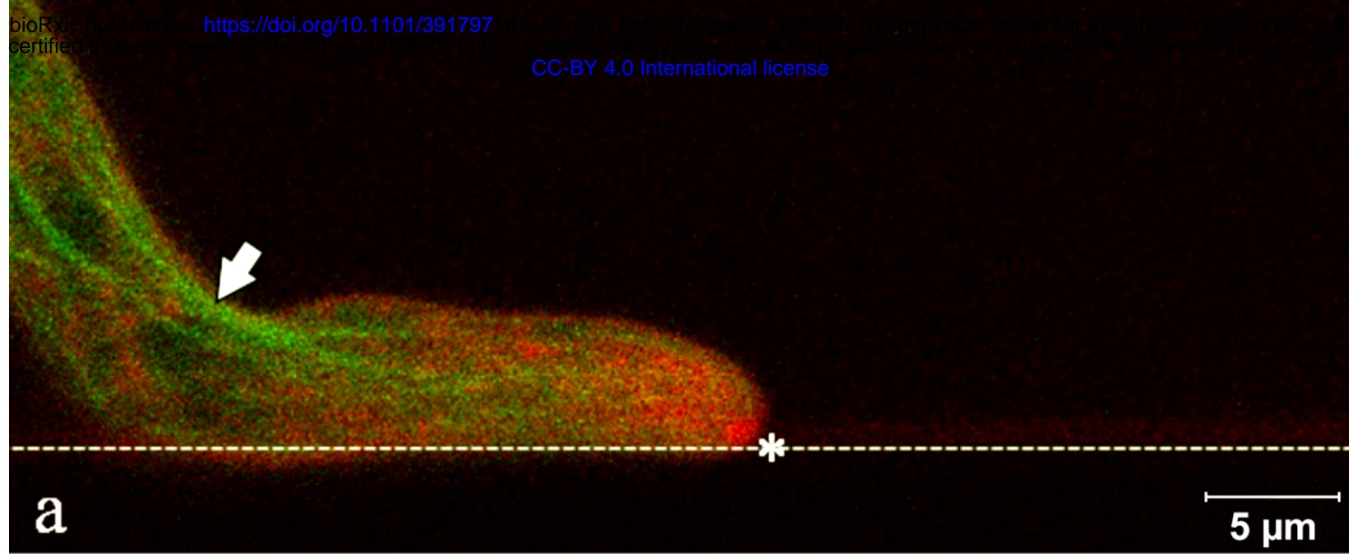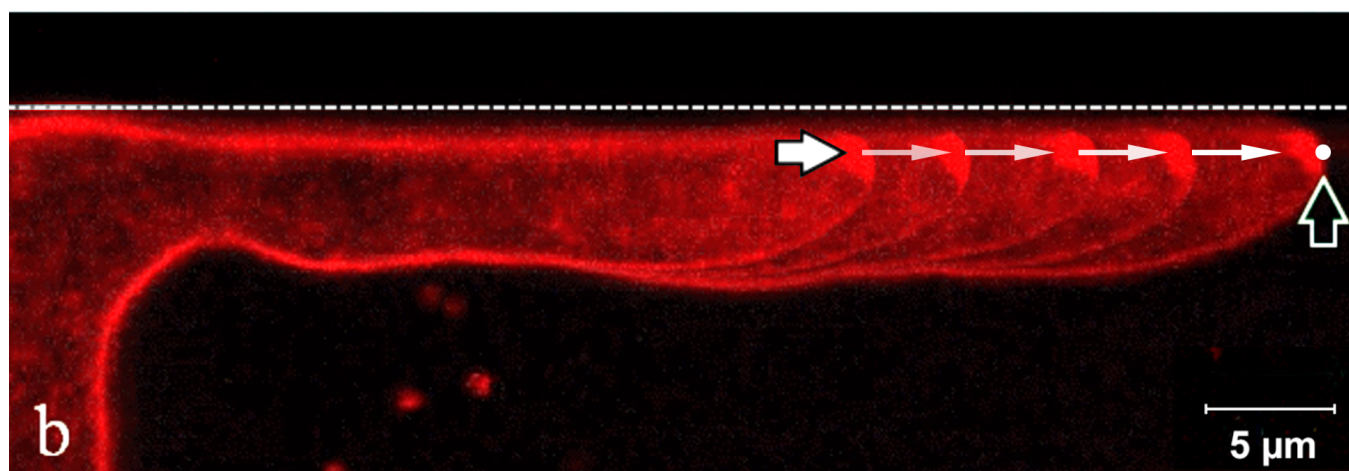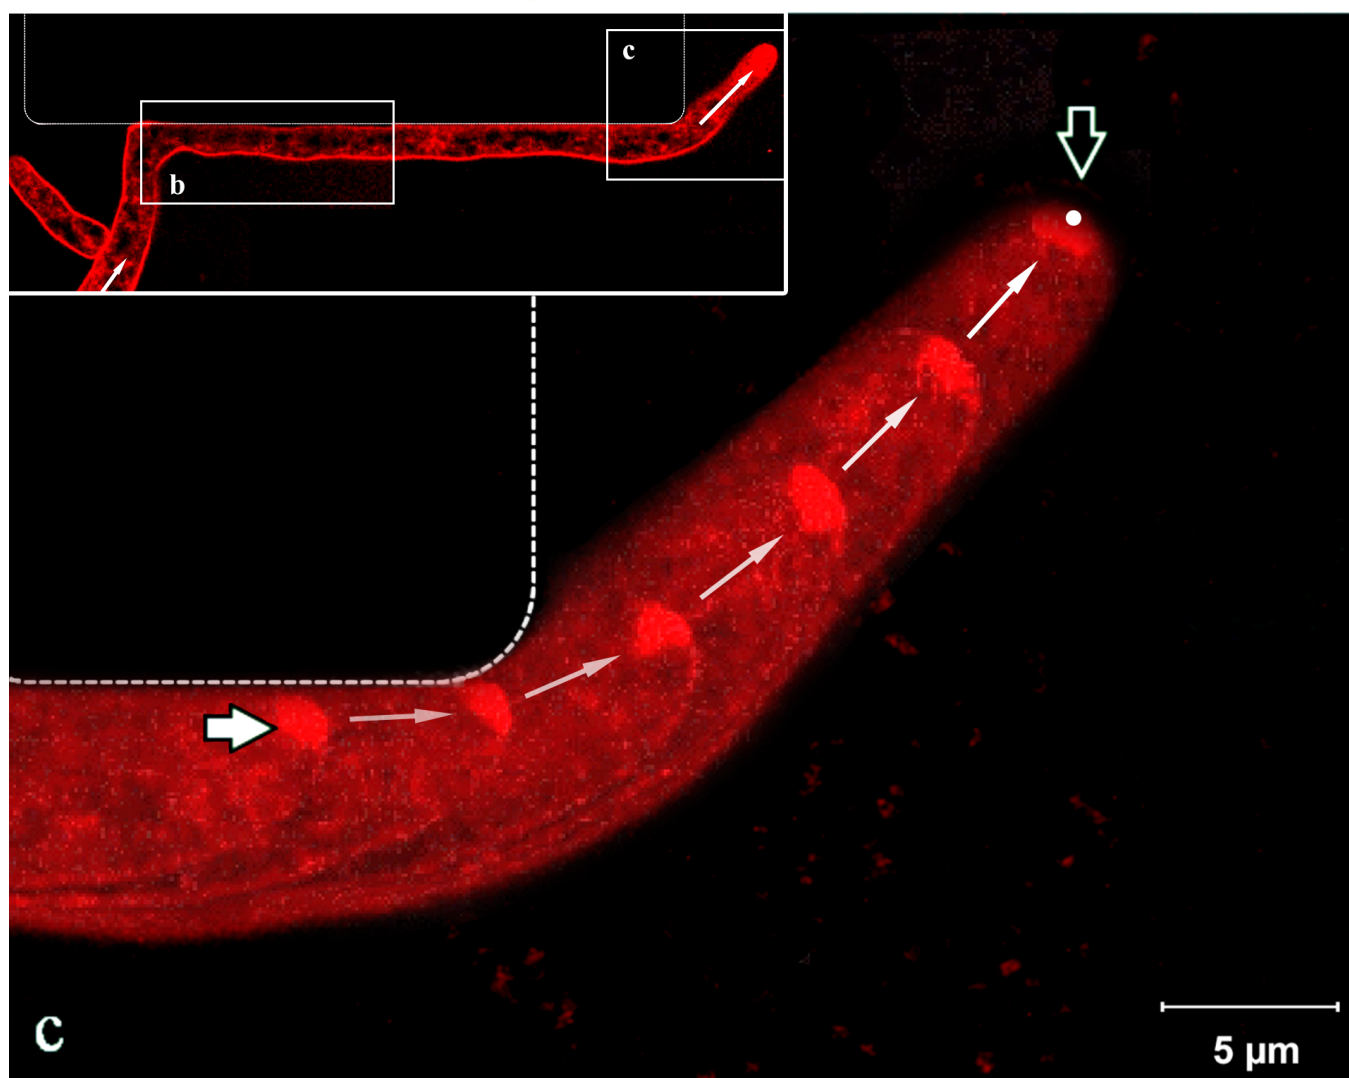

## Approach

Spitzenkörper occupies a central position in extreme apex

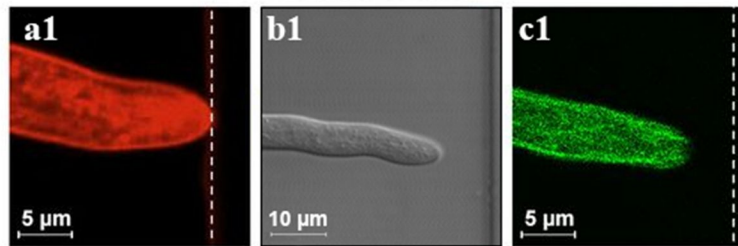

Microtubules longitudinal in hyphae

## Collision

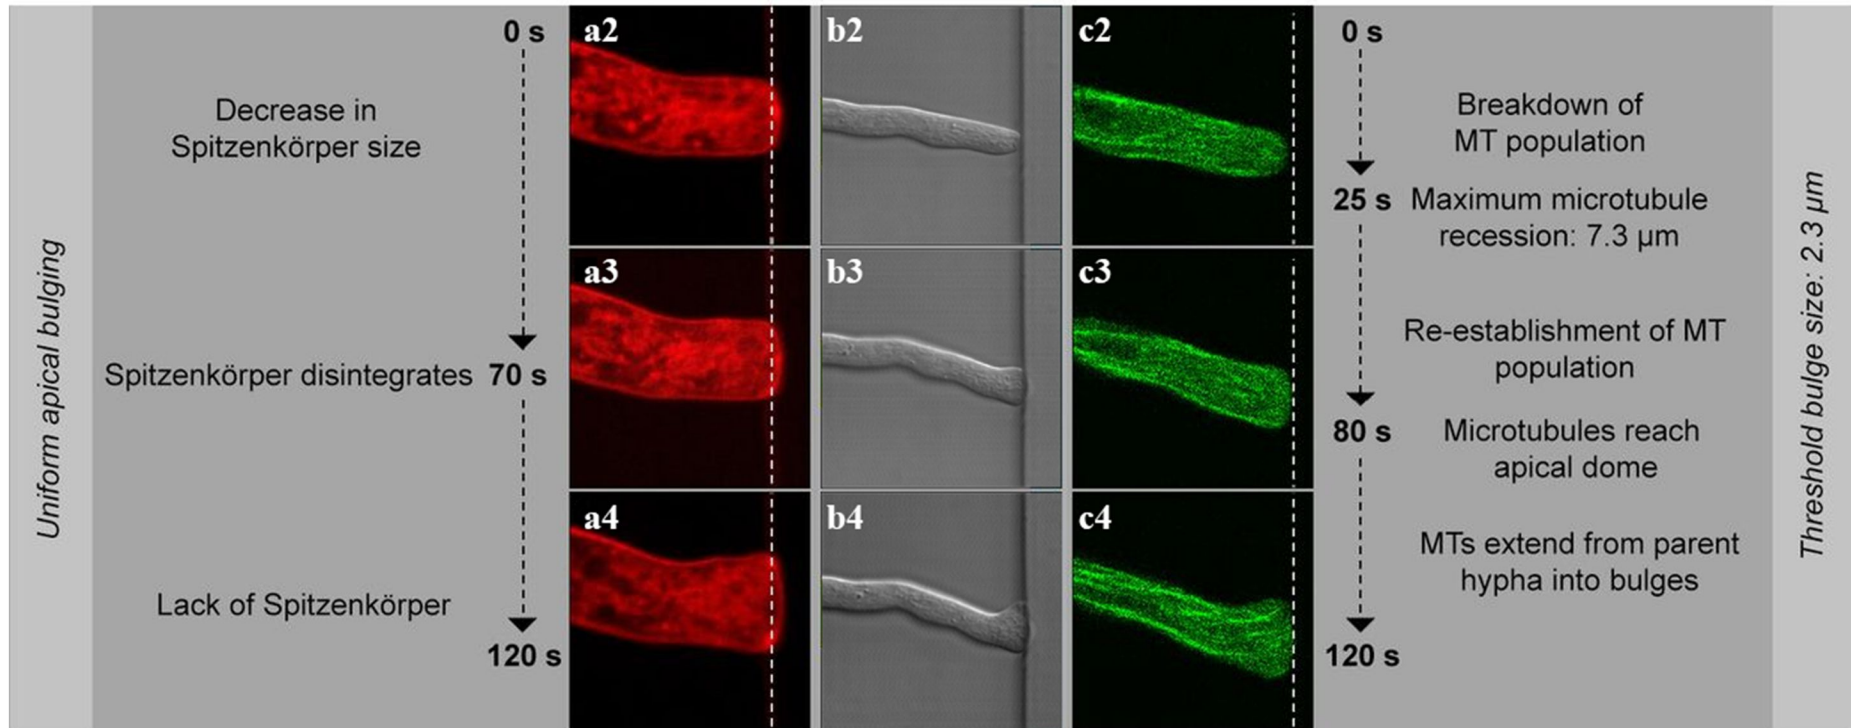

## Formation of daughter branches

Formation of one Spitzenkörper per daughter branch

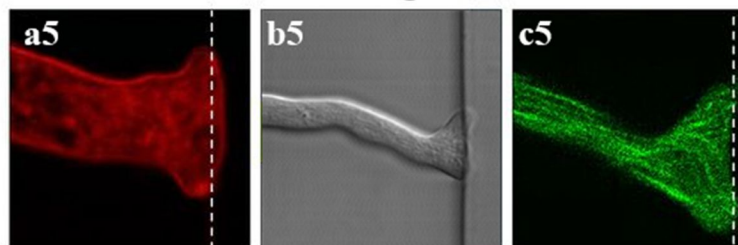

Establishment of individual MT population per daughter branch

## Approach

Spitzenkörper occupies a central position in the parent hypha

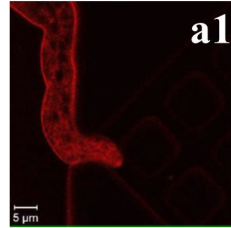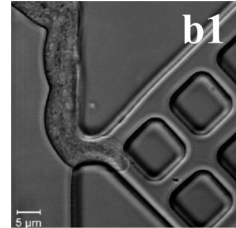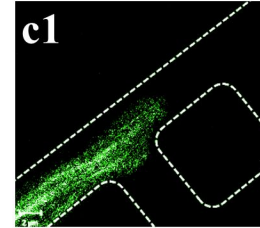

Microtubules longitudinal along hyphae

## Lateral opening

Spitzenkörper exclusively in parent hypha

0 s

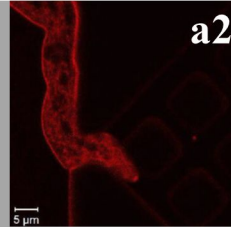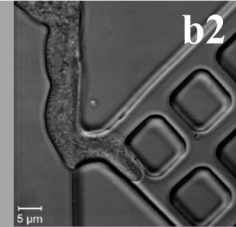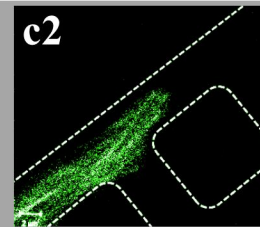

MTs exclusively in parent hypha, away from bulge

0 s

New Spitzenkörper appears in the bulge

70 s

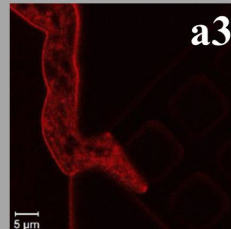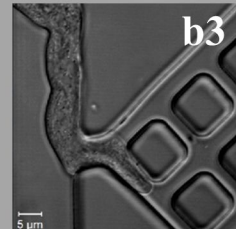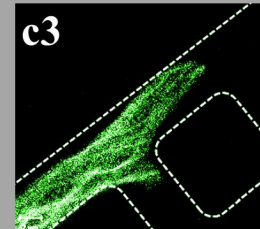

Some MTs migrate in the bulge

69 s

Spitzenkörper movement skews the bulge profile

140 s

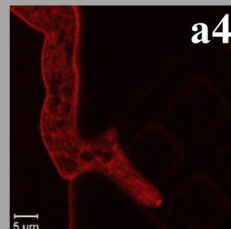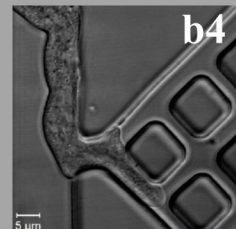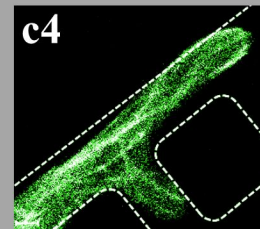

MTs in proto-branch organised orthogonally to the main branch

138 s

*Asymmetric apical bulging*

*Threshold bulge size 2.5 μm*

## Formation of a daughter branch

Formation of a Spitzenkörper for the daughter branch

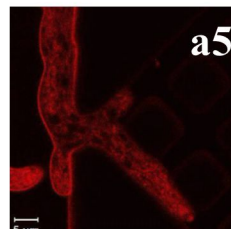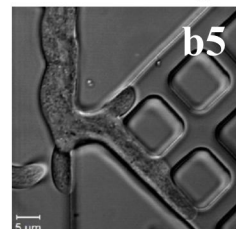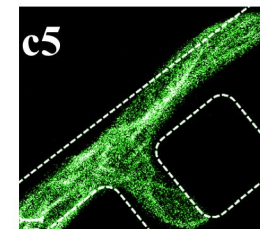

Establishment of a separate MT system for the daughter branch

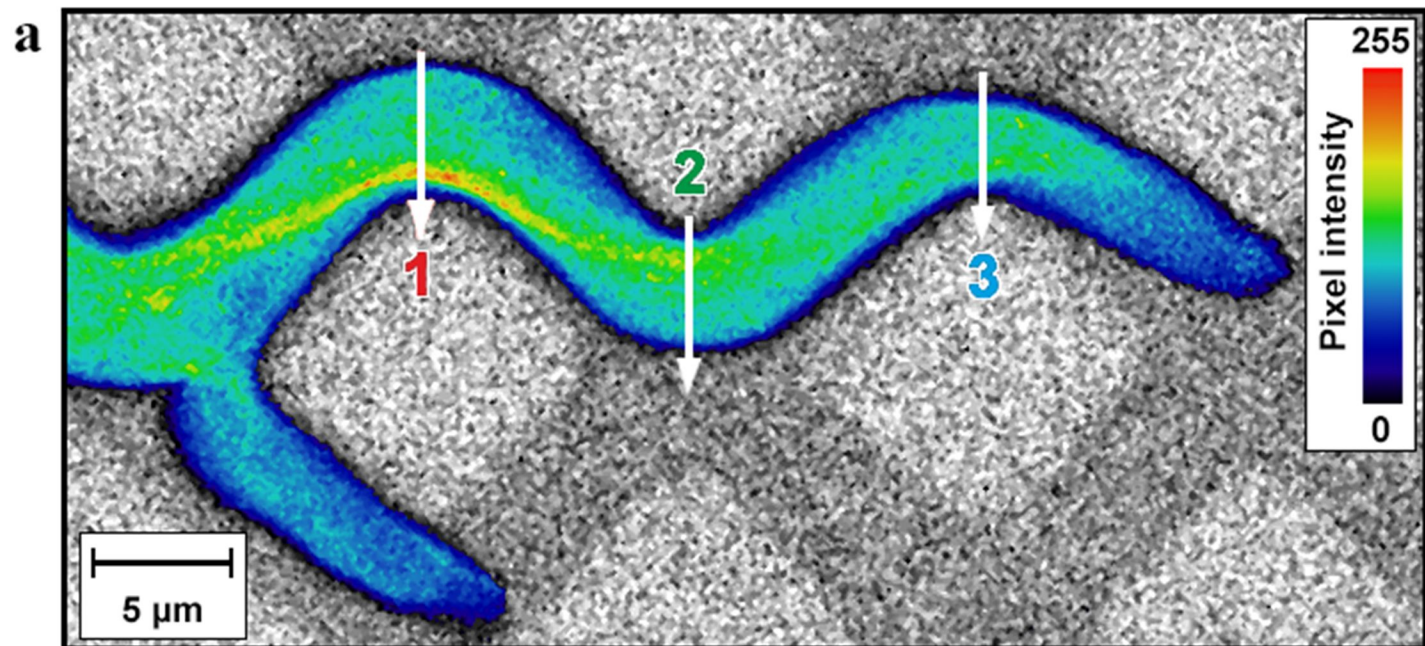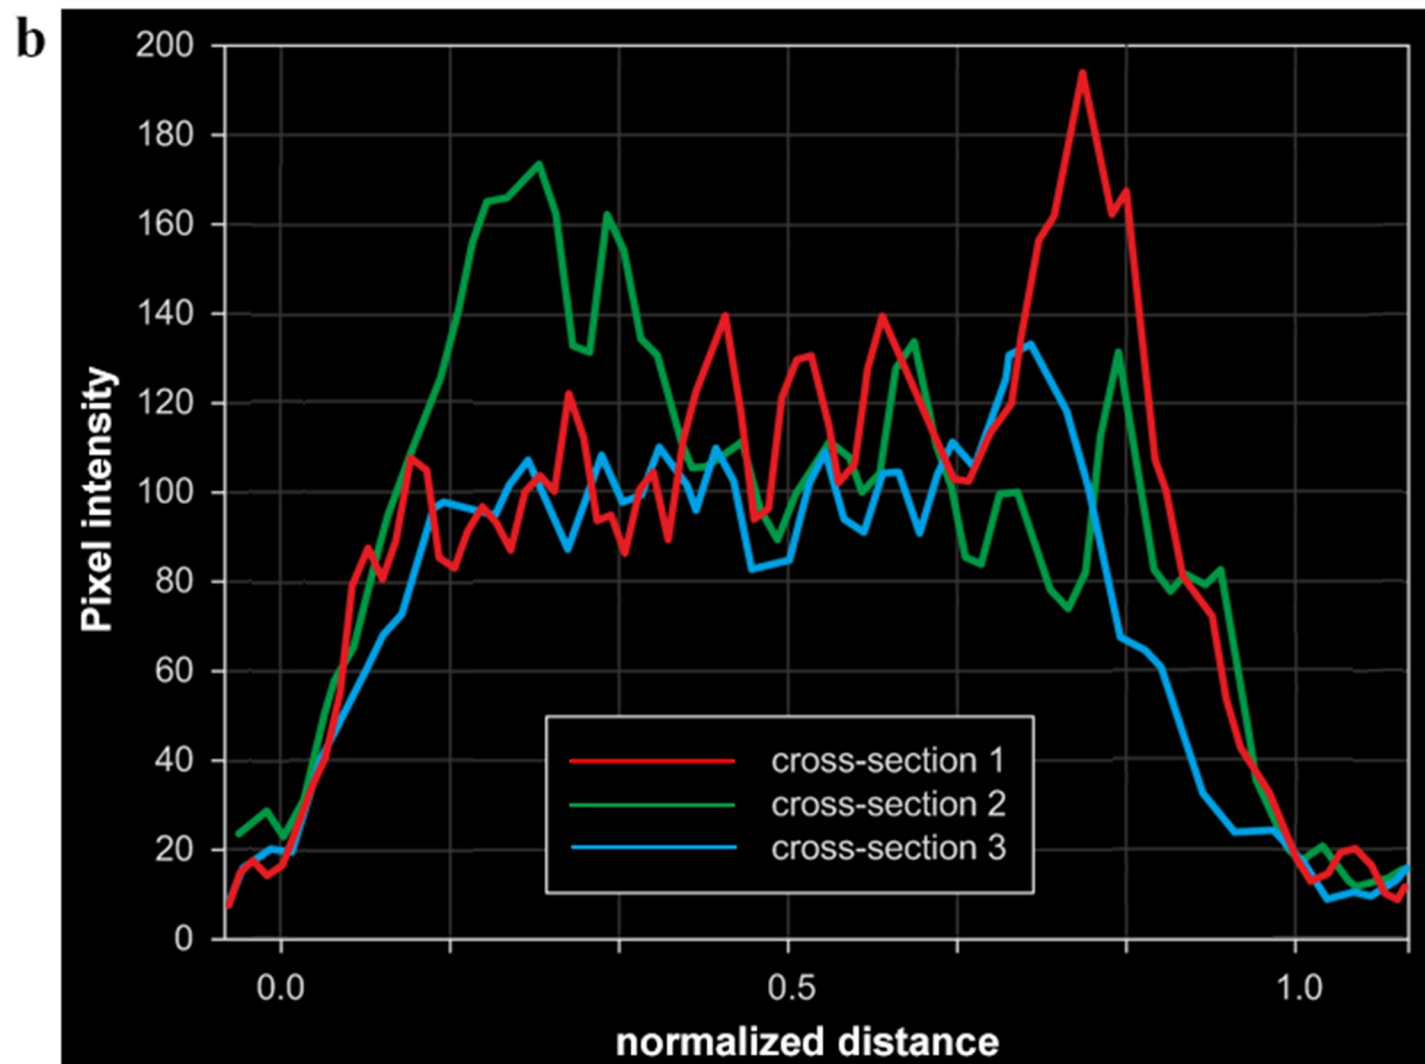

**Table 1.** Intracellular processes in the apical region involved in the growth of *Neurospora crassa* in open and constraining environments ([\*] indicates results from the present study)

| Growth                                                     | Hypha                                                                                                                                                                                                                                             | Spitzenkörper                                                                                                                                                                                  | Microtubules                                                                                                                                                                                          |
|------------------------------------------------------------|---------------------------------------------------------------------------------------------------------------------------------------------------------------------------------------------------------------------------------------------------|------------------------------------------------------------------------------------------------------------------------------------------------------------------------------------------------|-------------------------------------------------------------------------------------------------------------------------------------------------------------------------------------------------------|
| <b>Non-constraining geometries [various references, *]</b> |                                                                                                                                                                                                                                                   |                                                                                                                                                                                                |                                                                                                                                                                                                       |
| Single hypha                                               | <u>Profile</u> : parabolic, laterally-symmetrical<br><br><u>Source</u> : agar <sup>57-59,*</sup> and CNC*                                                                                                                                         | <u>Location and dynamics</u> : central, at the hyphal apex; permanently present<br><br><u>Source</u> : agar <sup>60,*</sup> and CNC*                                                           | <u>Orientation</u> : parallel to the hyphal axis<br><u>Distribution</u> : axially symmetrical<br><u>Dynamics</u> : population relatively constant<br><u>Source</u> : agar <sup>39-41,*</sup> and CNC* |
| Lateral branching                                          | <u>Occurrence</u> : statistically-regular<br><u>Angle</u> : approx. 45°<br><u>Profiles</u> : parabolic for both parental and daughter hyphae<br><u>Apical extension</u> : reduced during branching<br><u>Source</u> : agar <sup>63</sup> and CNC* | <u>Location and dynamics</u> : central, at the hyphal apices; permanently present in parental hypha, early appearance in the daughter hypha<br><br><u>Source</u> : agar <sup>63</sup> and CNC* | <u>Orientation</u> : parallel to hyphal axes<br><u>Distribution</u> : axially symmetrical<br><u>Dynamics</u> : population relatively constant<br><br><u>Source</u> : agar <sup>63</sup> and CNC*      |
| Apical branching                                           | <u>Occurrence</u> : statistically-regular, but rare<br><u>Angle</u> : V-shaped, approx. 45°<br><u>Profiles</u> : initial round-up for the twin hyphae<br><u>Apical extension</u> : reduced during branching<br><u>Source</u> : agar <sup>63</sup> | <u>Location and dynamics</u> : retracts from the apex, disappears, then two Spitzenkörper centres emerge at the centres of hyphal apices<br><br><u>Source</u> : agar <sup>63</sup>             | <u>Orientation</u> : parallel to hyphal axes<br><u>Distribution</u> : axially symmetrical<br><u>Dynamics</u> : population relatively constant<br><br><u>Source</u> : agar <sup>40,82</sup>            |
| <b>Constraining geometries [*]</b>                         |                                                                                                                                                                                                                                                   |                                                                                                                                                                                                |                                                                                                                                                                                                       |
| Nestling                                                   | <u>Occurrence</u> : triggered by contact at shallow angles<br><u>Angle</u> : change of direction as dictated by the wall<br><u>Profiles</u> : skewed off-axis, towards the wall<br><u>Apical extension</u> : unchanged                            | <u>Location and dynamics</u> : off-axis location, pressing against the obstacle, return to central position after passing the obstacle                                                         | <u>Orientation</u> : aligned off-axis,<br><u>Distribution</u> : axially asymmetrical, ‘cutting corners’<br><u>Dynamics</u> : population relatively constant                                           |
| Hit & split                                                | <u>Occurrence</u> : triggered by near-orthogonal collisions<br><u>Angle</u> : T-shaped branching, at ~180°<br><u>Profiles</u> : triangular, then progressively parabolic<br><u>Apical extension</u> : constant during splitting                   | <u>Location and dynamics</u> : disappears during splitting of parental hypha; then two Spitzenkörper centres form centrally at the apex of twin branches                                       | <u>Orientation</u> : random close to the splitting<br><u>Distribution</u> : random close to the splitting<br><u>Dynamics</u> : substantial dissolution, then formation in twin                        |
